# Supplementary material for: Hydrogenation of nitriles to primary amines catalyzed by an unsupported nanoporous palladium catalyst: understanding the essential reason for the high activity and selectivity of the catalyst
Source: Royal Society of Chemistry journal article supplement (doi:10.1039/d2nr01722a), 2022-01-01

## Supporting Information

### Hydrogenation of Nitriles to Primary Amines Catalyzed by Unsupported Nanoporous Palladium Catalyst: Understanding the Essential Reason for High Activity and Selectivity of Catalyst

Ye Lu,<sup>a,b</sup> Jixiao Wang,<sup>a</sup> Xiujuan Feng,<sup>\*,a</sup> Yanhui Li,<sup>\*,c</sup> Wei Zhang,<sup>c</sup> Yoshinori Yamamoto<sup>a,d,e</sup> and  
Ming Bao<sup>\*,a</sup>

<sup>a</sup> State Key Laboratory of Fine Chemicals, Dalian University of Technology, Dalian 116023, China

<sup>b</sup> Inner Mongolia Key Laboratory of Carbon Nanomaterials, Nano Innovation Institute (NII), College of Chemistry  
and Materials Science, Inner Mongolia University for Nationalities, Tongliao 028000, China

<sup>c</sup> School of Materials Science and Engineering, Dalian University of Technology, Dalian 116023, China

<sup>d</sup> Department of Chemistry, Graduate School of Science, Tohoku University, Sendai 980-8577, Japan.

<sup>e</sup> Research Organization of Science and Technology, Ritsumeikan University, Kusatsu, Shiga 525-8577, Japan.

Corresponding Authors

\*E-mail: fengxiujuan@dlut.edu.cn

yhli@dlut.edu.cn

mingbao@dlut.edu.cn

### Table of Contents

|                                                                                               |      |
|-----------------------------------------------------------------------------------------------|------|
| 1. General Information.....                                                                   | S-2  |
| 2. Preparation of PdNPore Catalyst .....                                                      | S-2  |
| 3. Characterization of Catalyst .....                                                         | S-2  |
| 4. Activity Test .....                                                                        | S-5  |
| 5. Procedure for Hydrogenation of 4-Formylbenzotrile to 4-(Hydroxymethyl)<br>benzylamine..... | S-5  |
| 6. Deuterium-hydrogen Exchange Reaction.....                                                  | S-6  |
| 7. Characterization Data of Products .....                                                    | S-7  |
| 8. References.....                                                                            | S-13 |
| 9. Copies of <sup>1</sup> H and <sup>13</sup> C NMR Spectra of Products.....                  | S-14 |

## 1. General Information

$^1\text{H}$  and  $^{13}\text{C}$  NMR spectra were recorded on either a Varian Inova-400 (400 MHz for  $^1\text{H}$ , 100 MHz for  $^{13}\text{C}$ ) or a Bruker Avance II-400 (400 MHz for  $^1\text{H}$ , 100 MHz for  $^{13}\text{C}$ ) spectrometer;  $\text{CDCl}_3$  was used as a solvent, while tetramethylsilane (TMS) was used as an internal standard. The chemical shifts are reported in ppm downfield ( $\delta$ ) from TMS, and the coupling constants  $J$  are expressed in Hz. The peak patterns are labeled as follows: s, singlet; d, doublet; t, triplet; q, quartet; m, multiplet. Thin-layer chromatography (TLC) was carried out on  $\text{SiO}_2$  (silica gel 60 F254, Merck), and the spots were located with UV light, iodoplatinate reagent, or 1% aqueous  $\text{KMnO}_4$ . Flash chromatography was carried out on  $\text{SiO}_2$  (silica gel 60, 200–300 mesh). GC-MS analysis was performed with gas chromatography-mass spectra (Agilent 7890A/5975C) system (70 eV electron-impact ion source) equipped with an Agilent 19091s-433 (HP-5 ms) capillary column ( $30\text{ m} \times 250\ \mu\text{m} \times 0.25\ \mu\text{m}$ ). High resolution mass spectra were recorded on a GC-TOF mass spectrometry.

## 2. Preparation of PdNPore Catalyst

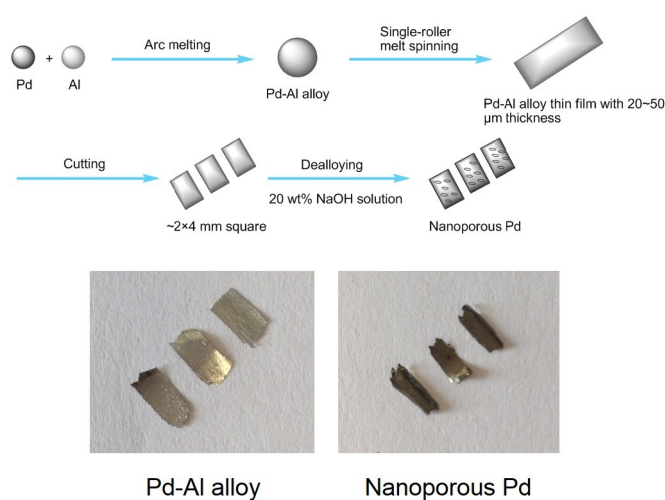

**Figure S1.** Schematic illustration of the fabrication process of nanoporous palladium catalyst.

## 3. Characterization of Catalyst

The SEM, TEM, HAADF-STEM, and EDX spectra of the fresh catalyst PdNPore and the catalyst PdNPore after six runs are shown in Figure S2 (a–h). These results obtained clearly revealed that the fresh catalyst PdNPore and the catalyst

PdNPore after six runs were essentially same.

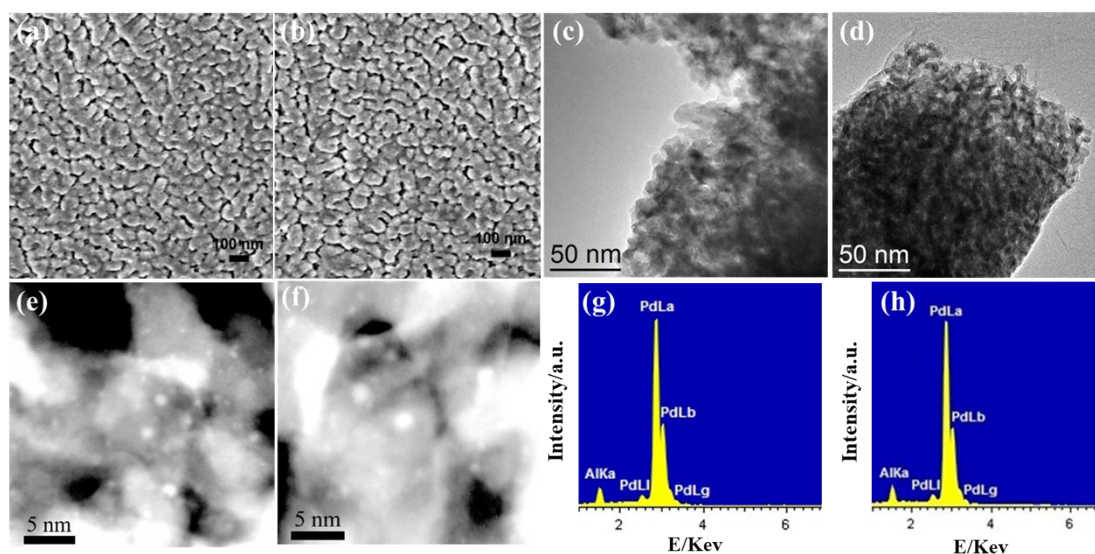

**Figure S2.** SEM images of (a) fresh PdNPore and (b) PdNPore after six runs; TEM images of (c) fresh PdNPore and (d) PdNPore after six runs; HAADF-STEM images of (e) fresh PdNPore and (f) PdNPore after six runs; EDX images of (g) fresh PdNPore and (h) PdNPore after six runs.

The results obtained from the  $N_2$  adsorption–desorption experiment (Figure S3a) revealed that the catalyst PdNPore possesses a high Brunauer-Emmett-Teller (BET) surface area ( $41 \text{ m}^2/\text{g}$ ) due to its porous structure. The pore size distribution of PdNPore was  $3.6 \text{ nm}$  as determined from the adsorption branch of isotherms based on density functional theory (DFT) method. The results of  $N_2$  adsorption–desorption of PdNPore after six runs are shown in Figures S3b. The results for the fresh one and that after six runs were essentially same.

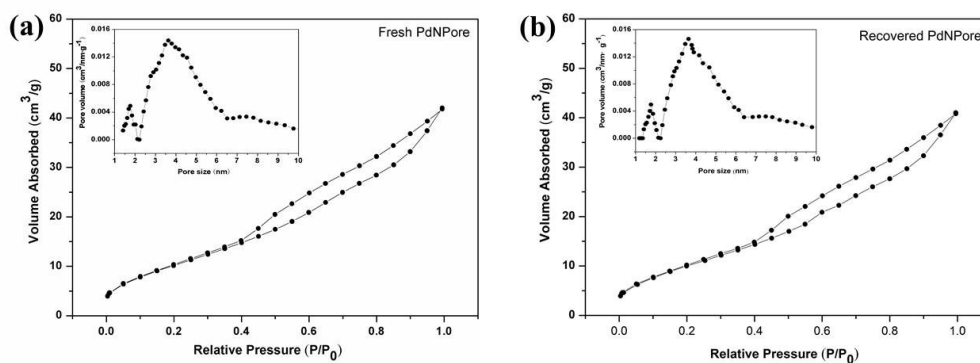

**Figure S3.** Nitrogen adsorption/desorption isotherm and corresponding pore size distribution curve (inset) of (a) fresh PdNPore and (b) PdNPore after six runs.

The XPS spectrum of the freshly prepared PdNPore catalyst showed the binding energies of Pd  $3d_{5/2}$  and Pd  $3d_{3/2}$  at 335.55 and 340.80 eV, respectively (Figure S4a), which higher than those of Pd  $3d$  in metallic palladium.<sup>1</sup> Figure S4b presents the X-ray photoelectron spectra of Al  $2p$  in metallic Al and PdNPore. Two kinds of Al  $2p$  signals located at 75.55 and 72.75 eV were observed when metallic Al was subjected to X-ray photoelectron spectroscopy. The former signal was assigned to aluminum oxide, and the latter was assigned to metallic Al.<sup>2</sup> This result indicated that some Al atoms of metallic Al were oxidized during the determination. The core-level spectrum of Al  $2p$  in PdNPore showed a peak with a binding energy of 74.55 eV, which was assigned to aluminum oxide. The binding energy of Al  $2p$  in PdNPore shifted to a binding energy lower than that of normal aluminum oxide. No peak of Al  $2p$  at approximately 72.75 eV was observed in the X-ray photoelectron spectrum of PdNPore, indicating that the residual Al in PdNPore transformed into aluminum oxide during dealloying and drying. The upshift of the binding energy for Pd  $3d$  in PdNPore can be ascribed to the transfer of electrons from Pd atoms to aluminum oxides derived from residual Al. The XPS spectra of PdNPore after six runs are shown in Figures S4 (c and d). The results for the fresh one and that after six runs were essentially same.

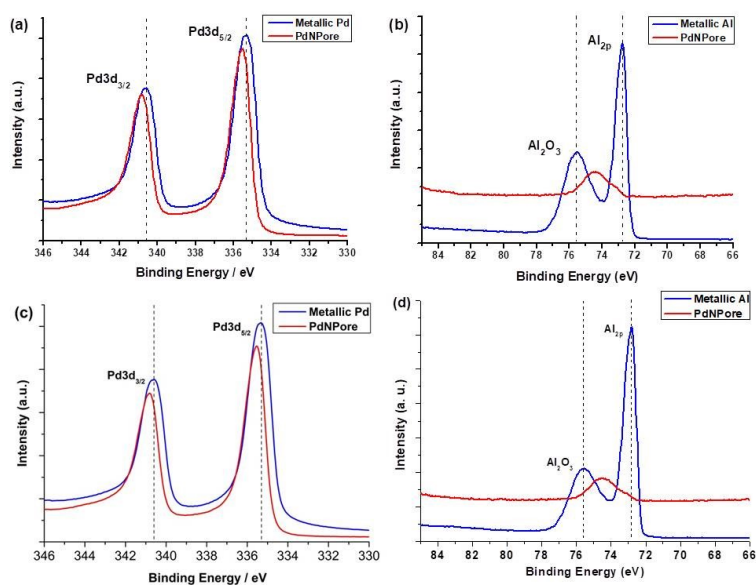

**Figure S4.** XPS spectra: (a) Pd  $3d$  and (b) Al  $2p$  of fresh PdNPore; (c) Pd  $3d$  and (d) Al  $2p$  of PdNPore after six runs.

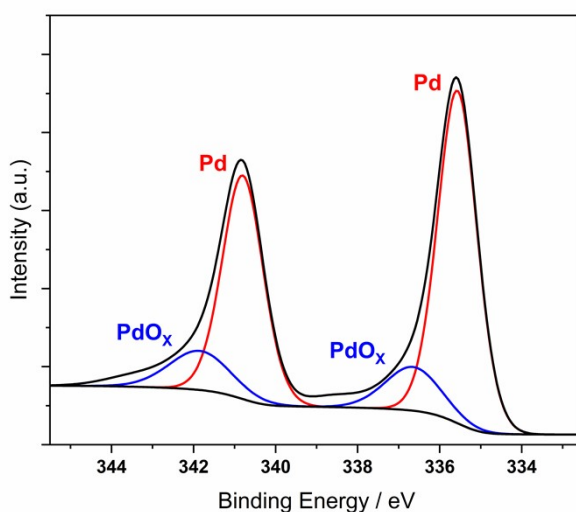

**Figure S5.** Deconvoluted XPS spectra of Pd 3d of fresh PdNPore.

#### 4. Activity Test

The 18% conversion of **1a** was observed with a TOF of 278 h<sup>-1</sup> using the PdNPore catalyst when the reaction time was shortened to 5 h. The 14% conversion of **1a** was observed with a TOF of 113 h<sup>-1</sup> when the Pd/C catalyst was used instead of the PdNPore catalyst. These results clearly indicated that the activity of the PdNPore catalyst is higher than those of the commercially available catalyst.

| Catalyst | Conversion (%) | TOF (h <sup>-1</sup> ) |
|----------|----------------|------------------------|
| PdNPore  | 18             | 278                    |
| Pd/C     | 14             | 113                    |

#### 5. Procedure for Hydrogenation of 4-Formylbenzonitrile to 4-(Hydroxymethyl)benzylamine

PdNPore (1.6 mg, 3 mol %), 4-formylbenzonitrile (**1y**, 65.6 mg, 0.5 mmol), and ethanol (EtOH, 3 mL) were placed in a 25 mL autoclave with a magnetic stir bar under N<sub>2</sub> atmosphere. The autoclave was purged thrice with H<sub>2</sub> gas, filled with H<sub>2</sub> to 5 atm pressure, and reaction mixture was stirred at 50 °C for 24 h. Then, the H<sub>2</sub> gas was replenished to 5 atm again, and the reaction mixture was stirred at 50 °C for another 24 h. The remaining H<sub>2</sub> was vented and the resulting mixture was evaporated

in vacuo to obtain the crude product, which was subsequently purified via silica gel chromatography (eluent: ethyl acetate/methanol = 20:1) to afford 4-(hydroxymethyl)benzylamine (**3y**) as a white solid.

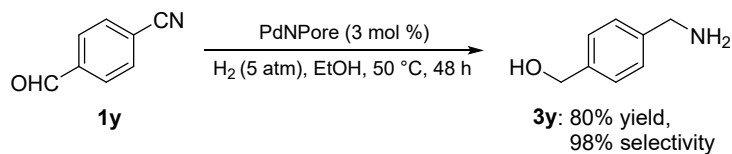

## 6. Deuterium-hydrogen Exchange Reaction

PdNPore (1.6 mg, 3 mol%) and  $\text{C}_2\text{D}_5\text{OD}$  (2 mL) were placed in a 25 mL autoclave with a magnetic stir bar under  $\text{N}_2$  atmosphere. The autoclave was purged thrice with  $\text{H}_2$  gas, filled with  $\text{H}_2$  to 5 atm pressure, and stirred at  $50 \text{ }^\circ\text{C}$  for 12 h. Then, the gas mixture generated was detected by GC-MS.

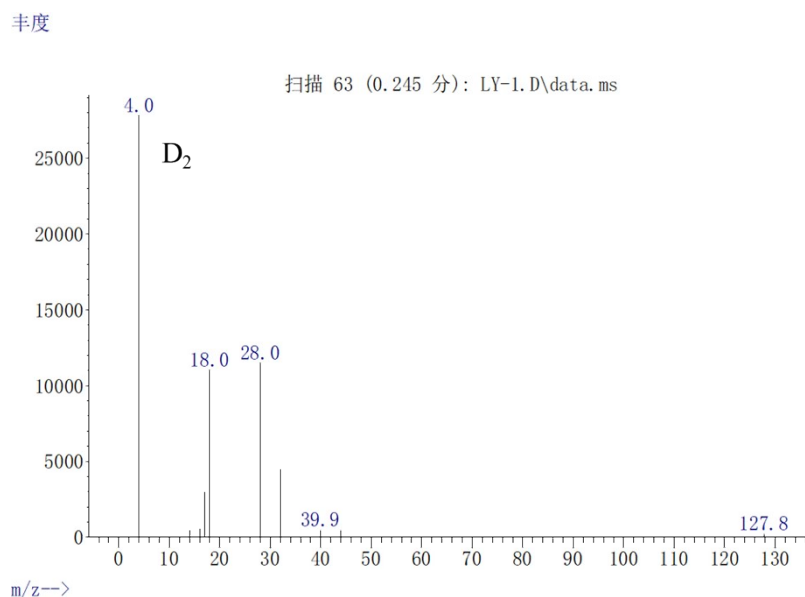

**Figure S6.** Mass spectrum of deuterium-hydrogen exchange reaction.

## 7. Characterization Data of Products

### Benzylamine (2a)<sup>3</sup>

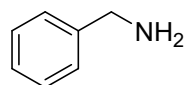

Yellow oil (48.8 mg, 91% yield). <sup>1</sup>H NMR (400 MHz, CDCl<sub>3</sub>): δ 7.35–7.20 (m, 5H), 3.84 (s, 2H), 1.54 (br, 2H); <sup>13</sup>C NMR (100 MHz, CDCl<sub>3</sub>): δ 143.3, 128.6, 127.1, 126.8, 46.5.

### 4-Methylbenzylamine (2b)<sup>3</sup>

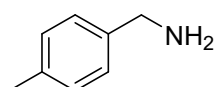

Colorless oil (53.9 mg, 89% yield). <sup>1</sup>H NMR (400 MHz, CDCl<sub>3</sub>): δ 7.20 (d, *J* = 8.0 Hz, 2H), 7.14 (d, *J* = 8.0 Hz, 2H), 3.83 (s, 2H), 2.34 (s, 3H), 2.06 (br, 2H); <sup>13</sup>C NMR (100 MHz, CDCl<sub>3</sub>): δ 140.1, 136.6, 129.4, 127.2, 46.2, 21.2.

### 3-Methylbenzylamine (2c)<sup>3</sup>

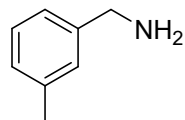

Colorless oil (52.1 mg, 86% yield). <sup>1</sup>H NMR (400 MHz, CDCl<sub>3</sub>): δ 7.28–7.22 (m, 1H), 7.16–7.05 (m, 3H), 3.84 (s, 2H), 2.38 (s, 3H), 1.83 (br, 2H); <sup>13</sup>C NMR (100 MHz, CDCl<sub>3</sub>): δ 143.1, 138.0, 128.4, 127.8, 127.5, 124.0, 46.3, 21.3.

### 4-Methoxybenzylamine (2d)<sup>3</sup>

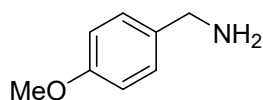

Yellow oil (58.3 mg, 85% yield). <sup>1</sup>H NMR (400 MHz, CDCl<sub>3</sub>): δ 7.23 (d, *J* = 6.8 Hz, 2H), 6.87 (d, *J* = 6.8 Hz, 2H), 3.80 (s, 5H), 1.60 (br, 2H); <sup>13</sup>C NMR (100 MHz, CDCl<sub>3</sub>): δ 158.7, 135.7, 128.4, 114.1, 55.4, 46.0.

### 3-Methoxybenzylamine (2e)<sup>3</sup>

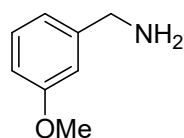

Yellow oil (49.4 mg, 72% yield).  $^1\text{H}$  NMR (400 MHz,  $\text{CDCl}_3$ ):  $\delta$  7.31–7.26 (m, 1H), 6.94–6.88 (m, 2H), 6.84–6.79 (m, 1H), 3.87 (s, 2H), 3.84 (s, 3H), 1.69 (br, 2H);  $^{13}\text{C}$  NMR (100 MHz,  $\text{CDCl}_3$ ):  $\delta$  160.0, 145.1, 129.7, 119.5, 112.7, 112.4, 55.3, 46.6.

#### 2-Methoxybenzylamine (2f)<sup>4</sup>

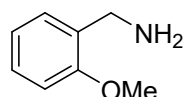

Yellow oil (41.2 mg, 60% yield).  $^1\text{H}$  NMR ( $\text{CDCl}_3$ , 400 MHz):  $\delta$  7.27–7.19 (m, 2H), 6.94–6.85 (m, 2H), 3.86–3.81 (br, 5H), 2.07 (br, 2H);  $^{13}\text{C}$  NMR ( $\text{CDCl}_3$ , 100 MHz):  $\delta$  157.6, 130.1, 128.7, 128.3, 120.7, 110.4, 55.3, 42.7.

#### 4-Fluorobenzylamine (2g)<sup>5</sup>

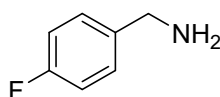

Yellow oil (51.3 mg, 82% yield).  $^1\text{H}$  NMR (400 MHz,  $\text{CDCl}_3$ ):  $\delta$  7.35–7.30 (m, 2H), 7.10–6.95 (m, 2H), 3.79 (s, 2H);  $^{13}\text{C}$  NMR (100 MHz,  $\text{CDCl}_3$ ):  $\delta$  162.1 (d,  $^1J_{\text{C-F}} = 243.3$  Hz), 135.7, 129.9 (d,  $^3J_{\text{C-F}} = 8.0$  Hz), 115.3 (d,  $^2J_{\text{C-F}} = 21.1$  Hz), 52.3.

#### 4-Methoxycarbonylbzylamine (2h)<sup>6</sup>

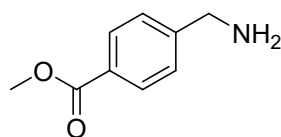

Yellow oil (68.6 mg, 83% yield).  $^1\text{H}$  NMR ( $\text{CDCl}_3$ , 400 MHz):  $\delta$  8.02 (d,  $J = 8.0$  Hz, 2H), 7.40 (d,  $J = 8.0$  Hz, 2H), 3.95 (s, 2H), 3.92 (s, 3H), 1.58 (br, 2H);  $^{13}\text{C}$  NMR ( $\text{CDCl}_3$ , 100 MHz):  $\delta$  167.1, 148.5, 129.9, 128.8, 127.0, 52.1, 46.3.

#### 4-(Aminomethyl)phenyl trifluoromethanesulfonate (2i)

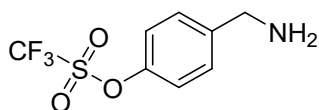

White solid (108.5 mg, 85% yield), mp 147–149 °C.  $^1\text{H}$  NMR ( $\text{CD}_3\text{CN}$ , 400 MHz):  $\delta$  7.38–7.33 (m, 4H), 6.49 (br, 2H), 4.06 (s, 2H);  $^{13}\text{C}$  NMR ( $\text{CDCl}_3$ , 100 MHz):  $\delta$  131.9,



129.0, 128.9, 128.7, 120.4 (q,  $J = 254.2$  Hz), 117.1. IR (neat): 3156.97, 1732.53, 1618.28, 1401.24, 1245.34, 1165.72, 1031.38, 864.69, 748.96, 698.77, 635.77, 517.80. HRMS (EI) Calcd for  $C_8H_8F_3NO_3S$ : 255.0177  $[M]^+$ ; found: 255.0171.

### 2-Naphthylmethanamine (2j)<sup>6</sup>

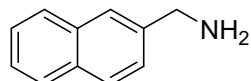

Yellow oil (62.1 mg, 79% yield). <sup>1</sup>H NMR (CDCl<sub>3</sub>, 400 MHz):  $\delta$  7.85 (d,  $J = 8.0$  Hz, 3H), 7.78 (s, 1H), 7.52–7.43 (m, 3H), 4.08 (s, 2H), 1.79 (br, 2H); <sup>13</sup>C NMR (CDCl<sub>3</sub>, 100 MHz):  $\delta$  140.2, 133.6, 132.7, 128.4, 127.8, 127.8, 126.2, 125.9, 125.7, 125.4, 46.5.

### 4-(Aminomethyl)pyridine (2k)<sup>7</sup>

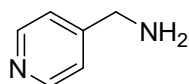

Colorless oil (43.3 mg, 80% yield). <sup>1</sup>H NMR (CDCl<sub>3</sub>, 400 MHz):  $\delta$  8.29 (d,  $J = 6.0$  Hz, 2H), 7.02 (d,  $J = 6.0$  Hz, 2H), 3.65 (s, 2H), 1.42 (br, 2H); <sup>13</sup>C NMR (CDCl<sub>3</sub>, 100 MHz):  $\delta$  151.8, 149.6, 121.8, 45.0.

### Furan-2-ylmethanamine (2l)<sup>8</sup>

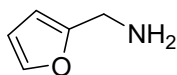

Colorless oil (35.45 mg, 73% yield). <sup>1</sup>H NMR (CDCl<sub>3</sub>, 400 MHz):  $\delta$  7.21 (d,  $J = 1.2$  Hz, 1H), 6.19–6.15 (m, 1H), 5.99 (d,  $J = 3.2$  Hz, 1H), 3.66 (s, 2H), 1.33 (br, 2H); <sup>13</sup>C NMR (CDCl<sub>3</sub>, 100 MHz):  $\delta$  156.7, 141.4, 110.1, 104.8, 39.2.

### Phenethylamine (2m)<sup>9</sup>

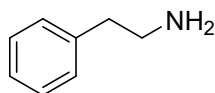

Yellow oil (53.3 mg, 88% yield). <sup>1</sup>H NMR (400 MHz, CDCl<sub>3</sub>):  $\delta$  7.33–7.26 (m, 2H), 7.25–7.17 (m, 3H), 2.93 (t,  $J = 6.8$  Hz, 2H), 2.82 (t,  $J = 6.8$  Hz, 2H); <sup>13</sup>C NMR (100 MHz, CDCl<sub>3</sub>)  $\delta$  140.0, 128.8, 128.6, 126.2, 51.1, 36.4.

### 4-Methylphenethylamine (2n)<sup>10</sup>

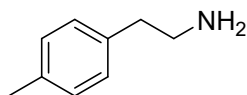

Yellow oil (57.5 mg, 85% yield). <sup>1</sup>H NMR (400 MHz, CDCl<sub>3</sub>): δ 7.13–7.05 (m, 4H), 2.89 (t, *J* = 7.2 Hz, 2H), 2.78 (t, *J* = 7.2 Hz, 2H), 2.34 (s, 3H); <sup>13</sup>C NMR (100 MHz, CDCl<sub>3</sub>): δ 136.9, 135.7, 129.2, 128.7, 51.3, 35.9, 21.1.

### 3-Methylphenethylamine (2o)<sup>11</sup>

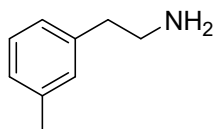

Yellow oil (55.4 mg, 82% yield). <sup>1</sup>H NMR (400 MHz, CDCl<sub>3</sub>): δ 7.09–7.02 (m, 1H), 6.93–6.84 (m, 3H), 2.78 (t, *J* = 7.2 Hz, 2H), 2.65 (t, *J* = 7.2 Hz, 2H), 2.21 (s, 3H); <sup>13</sup>C NMR (100 MHz, CDCl<sub>3</sub>): δ 140.0, 137.9, 129.5, 128.4, 126.9, 125.7, 51.2, 36.4, 21.4.

### 4-Methoxyphenethylamine (2p)<sup>12</sup>

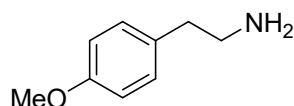

Yellow oil (62.8 mg, 83% yield). <sup>1</sup>H NMR (400 MHz, CDCl<sub>3</sub>): δ 7.06 (d, *J* = 8.4, 2H), 6.80 (d, *J* = 8.8 Hz, 2H), 3.77 (s, 3H), 2.84 (t, *J* = 7.2 Hz, 2H), 2.71 (t, *J* = 7.2 Hz, 2H); <sup>13</sup>C NMR (100 MHz, CDCl<sub>3</sub>): δ 158.1, 132.1, 129.6, 113.9, 55.3, 51.3, 35.5.

### 3,4-Dimethoxyphenethylamine (2q)<sup>13</sup>

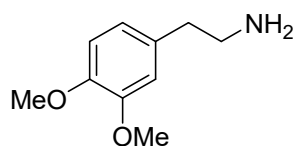

Yellow oil (70.7 mg, 78% yield). <sup>1</sup>H NMR (400 MHz, CDCl<sub>3</sub>): δ 6.79–6.74 (m, 1H), 6.71–6.66 (m, 2H), 3.85 (s, 6H), 2.87 (t, *J* = 7.2 Hz, 2H), 2.73 (t, *J* = 7.2 Hz, 2H); <sup>13</sup>C NMR (100 MHz, CDCl<sub>3</sub>): δ 148.9, 147.4, 132.5, 120.5, 111.9, 111.2, 55.9, 55.8, 51.2, 35.9.

### 4-Fluorophenethylamine (2r)<sup>12</sup>

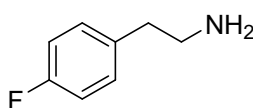

Yellow oil (59.8 mg, 86% yield).  $^1\text{H}$  NMR (400 MHz,  $\text{CDCl}_3$ ):  $\delta$  7.16–7.10 (m, 2H), 7.05–6.90 (m, 2H), 2.88 (t,  $J = 7.2$  Hz, 2H), 2.77 (t,  $J = 7.2$  Hz, 2H);  $^{13}\text{C}$  NMR (100 MHz,  $\text{CDCl}_3$ ):  $\delta$  161.6 (d,  $^1J_{\text{C-F}} = 242.4$  Hz), 135.7 (d,  $^4J_{\text{C-F}} = 3.2$  Hz), 130.1 (d,  $^3J_{\text{C-F}} = 7.8$  Hz), 115.3 (d,  $^2J_{\text{C-F}} = 21.0$  Hz), 51.2, 35.6.

#### 4-Trifluoromethylphenethylamine (2s)<sup>12</sup>

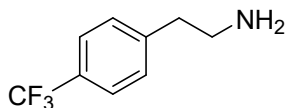

Yellow oil (83.2 mg, 88% yield).  $^1\text{H}$  NMR (400 MHz,  $\text{CDCl}_3$ ):  $\delta$  7.52 (d,  $J = 8.0$  Hz, 2H), 7.26 (d,  $J = 8.0$  Hz, 2H), 2.91 (t,  $J = 6.0$  Hz, 2H), 2.83 (t,  $J = 6.0$  Hz, 2H);  $^{13}\text{C}$  NMR (100 MHz,  $\text{CDCl}_3$ ):  $\delta$  144.2, 129.3, 129.1 (q,  $^2J_{\text{C-F}} = 32.2$  Hz), 125.5 (q,  $^3J_{\text{C-F}} = 3.7$  Hz), 123.1, 50.7, 36.3.

#### 1-Hexanamine (2u)<sup>9</sup>

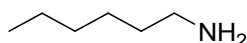

Colourless oil (44.0 mg, 87% yield).  $^1\text{H}$  NMR (400 MHz,  $\text{CDCl}_3$ ):  $\delta$  2.59 (t,  $J = 7.2$  Hz, 2H), 1.51–1.43 (m, 2H), 1.35–1.27 (m, 6H), 0.87 (t,  $J = 6.8$  Hz, 3H);  $^{13}\text{C}$  NMR (100 MHz,  $\text{CDCl}_3$ ):  $\delta$  50.2, 31.9, 30.1, 27.2, 22.8, 14.2.

#### Cyclohexanemethanamine (2v)<sup>9</sup>

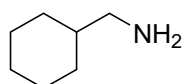

Yellow oil (47.5 mg, 84% yield).  $^1\text{H}$  NMR (400 MHz,  $\text{CDCl}_3$ ):  $\delta$  2.41 (d,  $J = 6.8$  Hz, 2H), 1.75–1.63 (m, 5H), 1.52–1.40 (m, 1H), 1.30–1.08 (m, 3H), 0.95–0.82 (m, 2H);  $^{13}\text{C}$  NMR (100 MHz,  $\text{CDCl}_3$ ):  $\delta$  57.0, 37.9, 31.6, 26.8, 26.2.

#### 4-(Hydroxymethyl)benzonitrile (2y)<sup>14</sup>

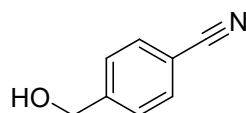

White solid (61.2 mg, 92% yield), mp 41–43 °C, (lit. mp 41–42 °C).  $^1\text{H}$  NMR (400 MHz,  $\text{CDCl}_3$ ):  $\delta$  7.61 (d,  $J = 8.4$  Hz, 2H), 7.46 (d,  $J = 8.4$  Hz, 2H), 4.75 (s, 2H), 2.78 (s, 1H);  $^{13}\text{C}$  NMR (100 MHz,  $\text{CDCl}_3$ ):  $\delta$  146.5, 132.3, 127.0, 118.9, 110.8, 64.0.

#### 4-(Hydroxymethyl)benzylamine (3y)<sup>15</sup>

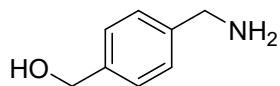

White solid (54.9 mg, 80% yield), mp 80–82 °C, (lit. mp 79 °C). <sup>1</sup>H NMR (400 MHz, CDCl<sub>3</sub>): δ 7.36–7.25 (m, 4H), 4.68 (s, 2H), 3.86 (s, 2H), 1.67 (s, 3H); <sup>13</sup>C NMR (100 MHz, CDCl<sub>3</sub>): δ 142.7, 139.5, 127.3, 127.3, 65.1, 46.2.

#### 4-Aminobenzonitrile (2z)<sup>16</sup>

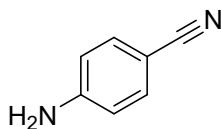

Yellow solid (54.3 mg, 92% yield), mp 82–84 °C, (lit. mp 83–86 °C). <sup>1</sup>H NMR (400 MHz, CDCl<sub>3</sub>): δ 7.42–7.38 (m, 2H), 6.66–6.62 (m, 2H), 4.21 (br, 2H); <sup>13</sup>C NMR (100 MHz, CDCl<sub>3</sub>): δ 150.5, 133.8, 120.2, 114.5, 100.1.

## 8. References

- (1) I. Matolínová, V. Johánek, T. Skála, K. Veltruská and V. Matolín, *Appl. Surf. Sci.*, 2005, **245**, 87–93.
- (2) H. Li, A. Belkind, F. Jansen and Z. Orban, *Surf. Coat. Tech.*, 1997, **92**, 171–177.
- (3) M. A. Ayedi, Y. L. Bigot, H. Ammar, S. Abid, R. E. Gharbi and M. Delmas, *Synth. Commun.*, 2013, **43**, 2127–2133.
- (4) A. Mukherjee, D. Srimani, S. Chakraborty, Y. Ben-David and D. Milstein, *J. Am. Chem. Soc.*, 2015, **137**, 8888–8891.
- (5) T. Komanoya, T. Kinemura, Y. Kita, K. Kamata and M. Hara, *J. Am. Chem. Soc.*, 2017, **139**, 11493–11499.
- (6) N. Murai, M. Miyano, M. Yonaga and K. Tanaka, *Org. Lett.*, 2012, **14**, 2818–2821.
- (7) P. Charpentier, J.-F. Brière, G. Dupas, G. Quéguiner and J. Bourguignon, *Tetrahedron*, 1996, **52**, 10441–10454.
- (8) C. Gunanathan and D. Milstein, *Angew. Chem. Int. Ed.*, 2008, **47**, 8661–8664.
- (9) N. Chatterjee and A. Goswami, *Org. Biomol. Chem.*, 2015, **13**, 7940–7945.
- (10) S. Liu, Y. Yang, X. Zhen, J. Li, H. He, J. Feng and A. Whiting, *Org. Biomol. Chem.*, 2012, **10**, 663–670.
- (11) C. L. Border, D. J. Craik and B. P. Shehan, *Magn. Reson. Chem.*, 1993, **31**, 222–230.
- (12) M. Szostak, B. Sautier, M. Spain and D. J. Procter, *Org. Lett.*, 2014, **16**, 1092–1095.
- (13) J. Feng, S. Handa, F. Gallou and B. H. Lipshutz, *Angew. Chem. Int. Ed.*, 2016, **55**, 8979–8983.
- (14) M.-H. Yang, J. R. Hunt, N. Sharifi and R. A. Altman, *Angew. Chem. Int. Ed.*, 2016, **55**, 9080–9083.
- (15) S. Leng, Q. Qiao, L. Miao, W. Deng, J. Cui and Z. Xu, *Chem. Commun.*, 2017, **53**, 6448–6451.
- (16) D. Chen, Y. Zhou, H. Zhou, S. Liu, Q. Liu, K. Zhang and Y. Uozumi, *Synlett.*, 2018, **29**, 1765–1768.

## 9. Copies of $^1\text{H}$ and $^{13}\text{C}$ NMR Spectra of Products

$^1\text{H}$  NMR, 400 MHz,  $\text{CDCl}_3$

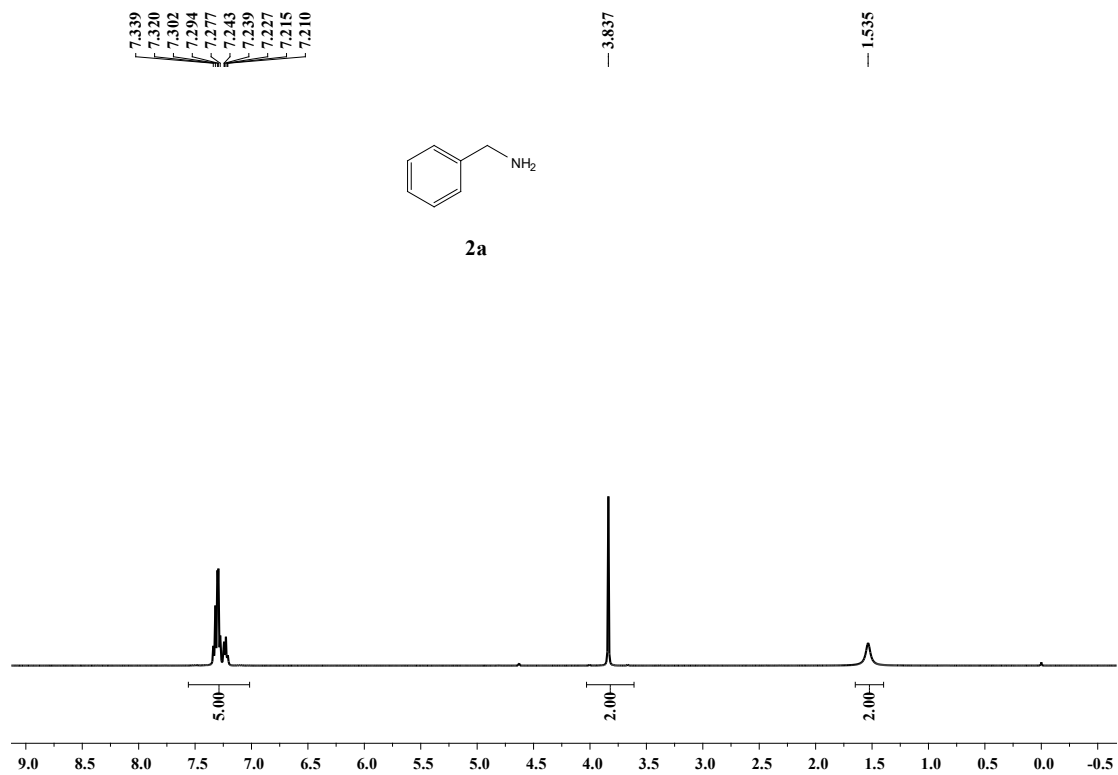

$^{13}\text{C}$  NMR, 100 MHz,  $\text{CDCl}_3$

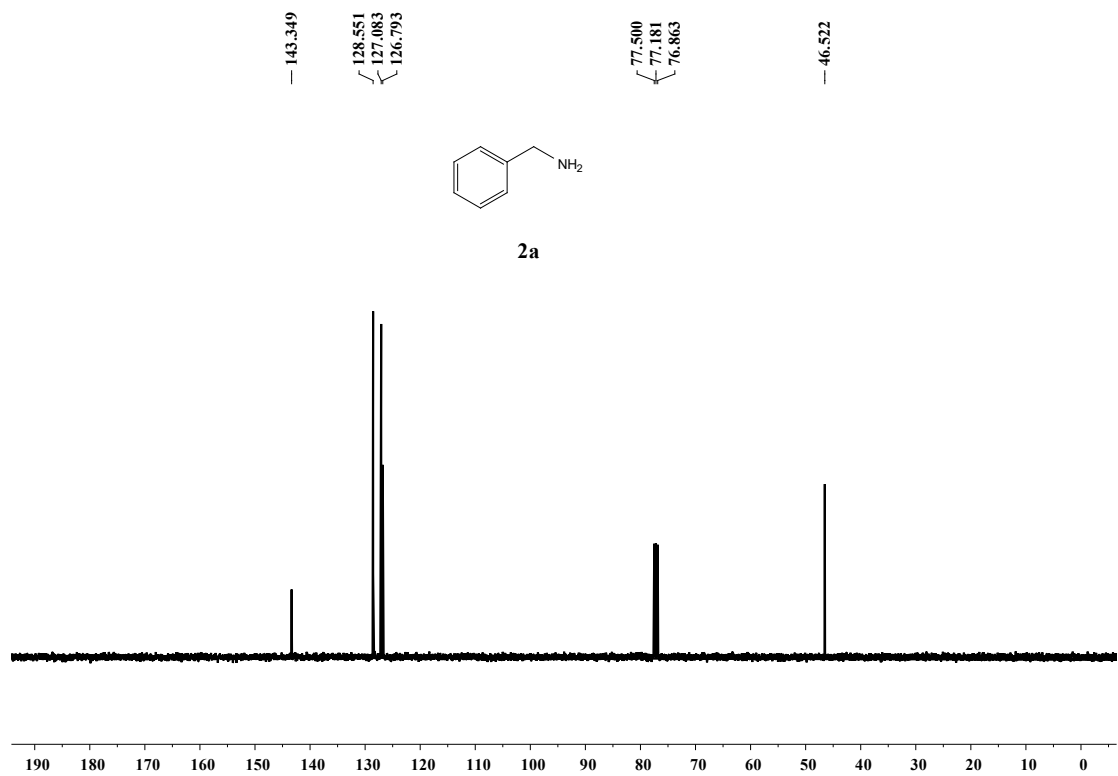

$^1\text{H}$  NMR, 400 MHz,  $\text{CDCl}_3$

7.210  
7.190  
7.153  
7.133

3.826

2.336  
2.055

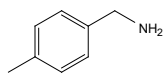

**2b**

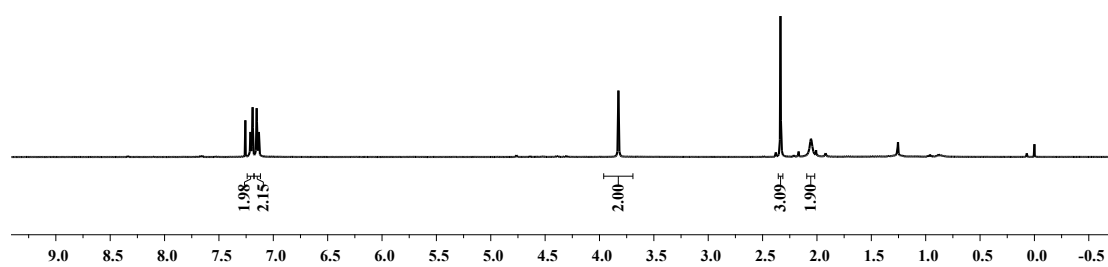

$^{13}\text{C}$  NMR, 100 MHz,  $\text{CDCl}_3$

139.965  
136.470  
129.240  
127.106

77.345  
77.028  
76.710

46.103

21.059

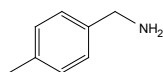

**2b**

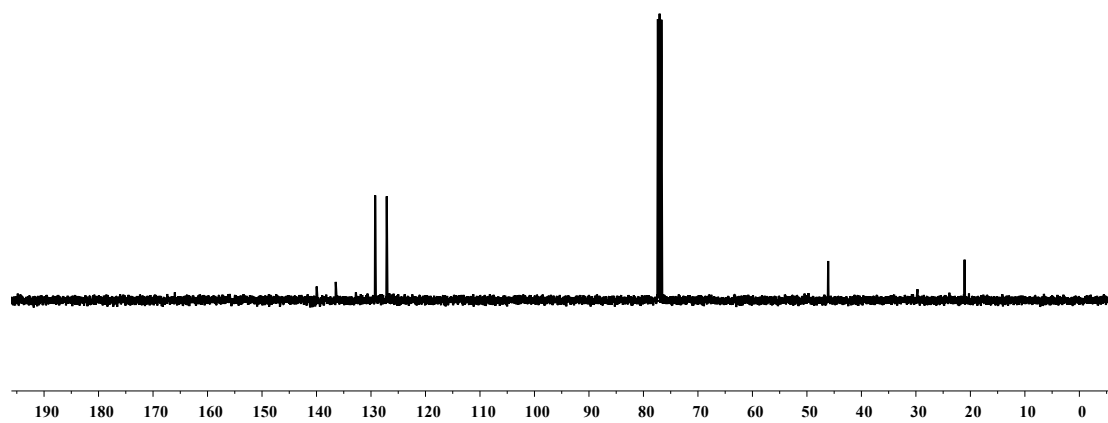

$^1\text{H}$  NMR, 400 MHz,  $\text{CDCl}_3$

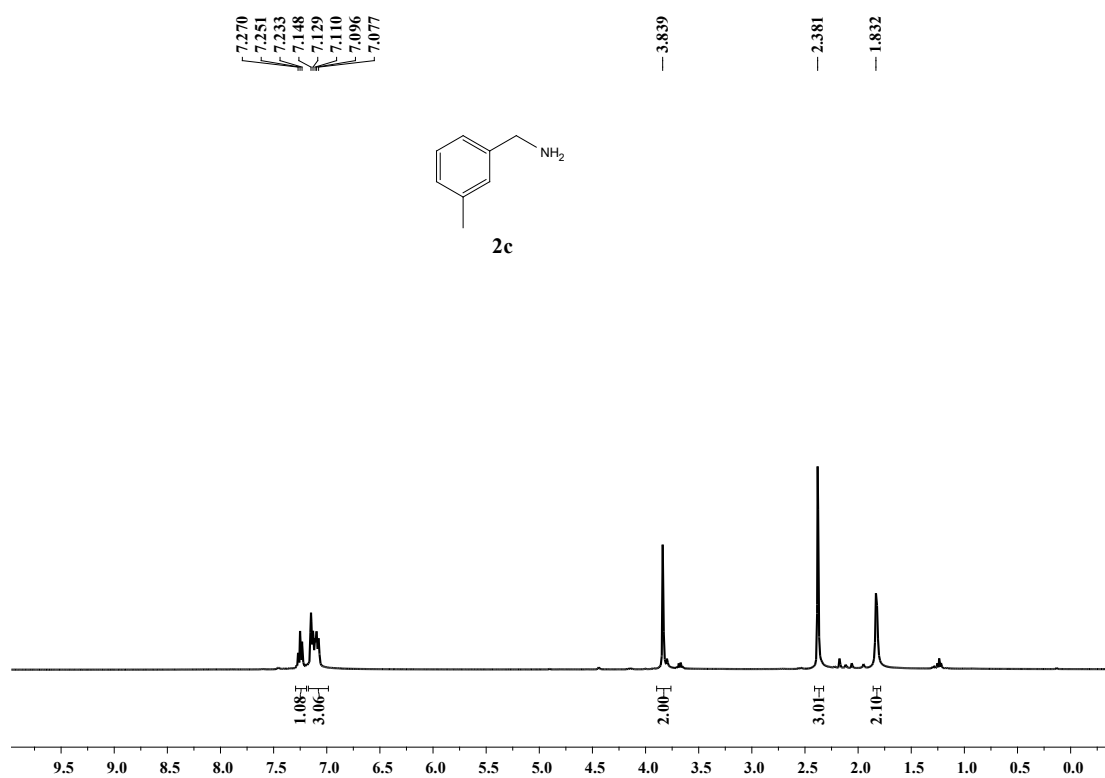

$^{13}\text{C}$  NMR, 100 MHz,  $\text{CDCl}_3$

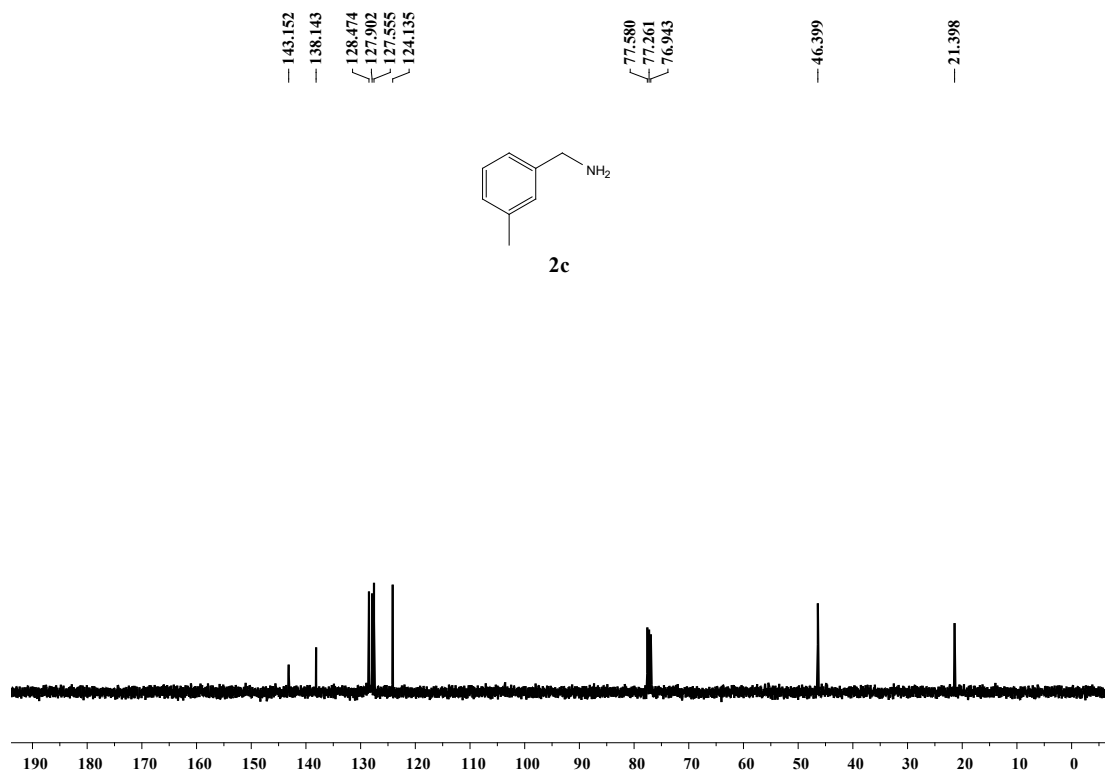



$^1\text{H}$  NMR, 400 MHz,  $\text{CDCl}_3$

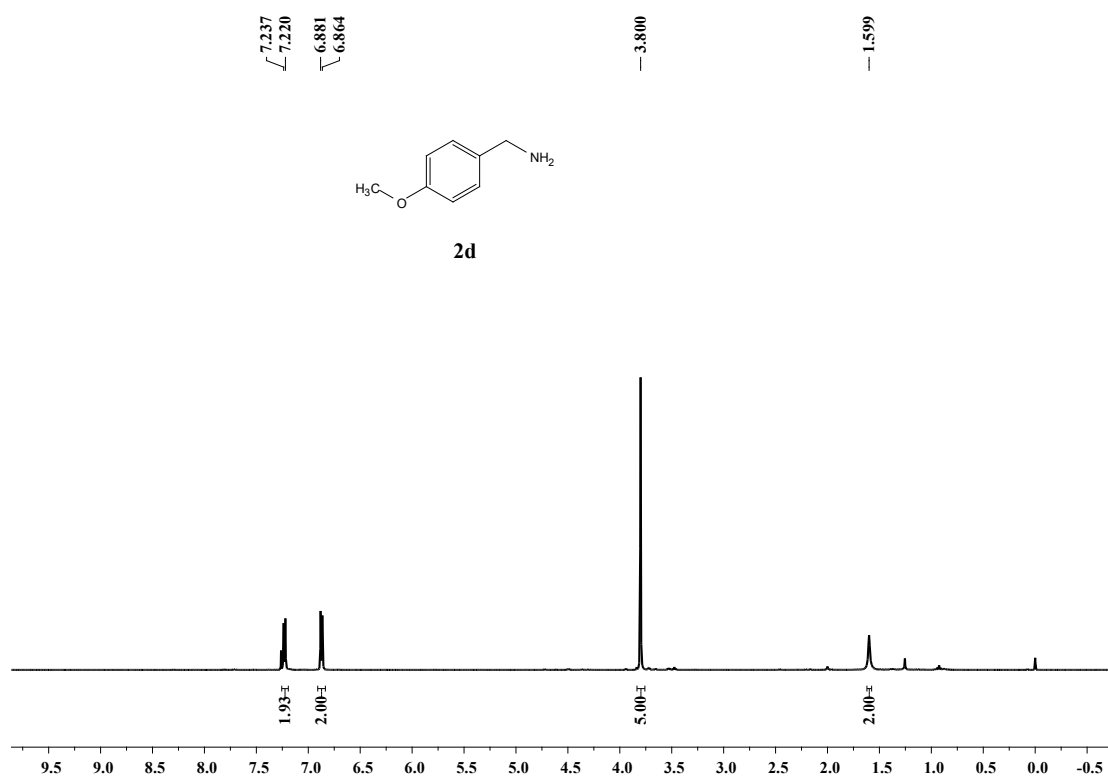

$^{13}\text{C}$  NMR, 100 MHz,  $\text{CDCl}_3$

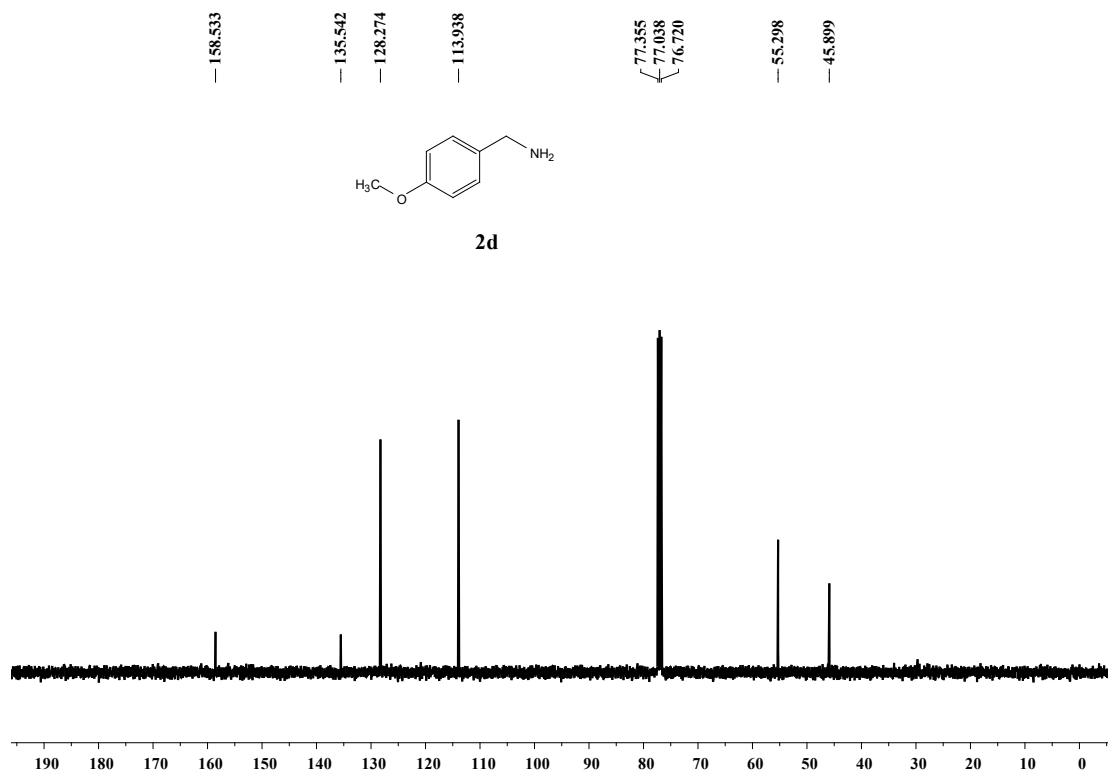

$^1\text{H}$  NMR, 400 MHz,  $\text{CDCl}_3$

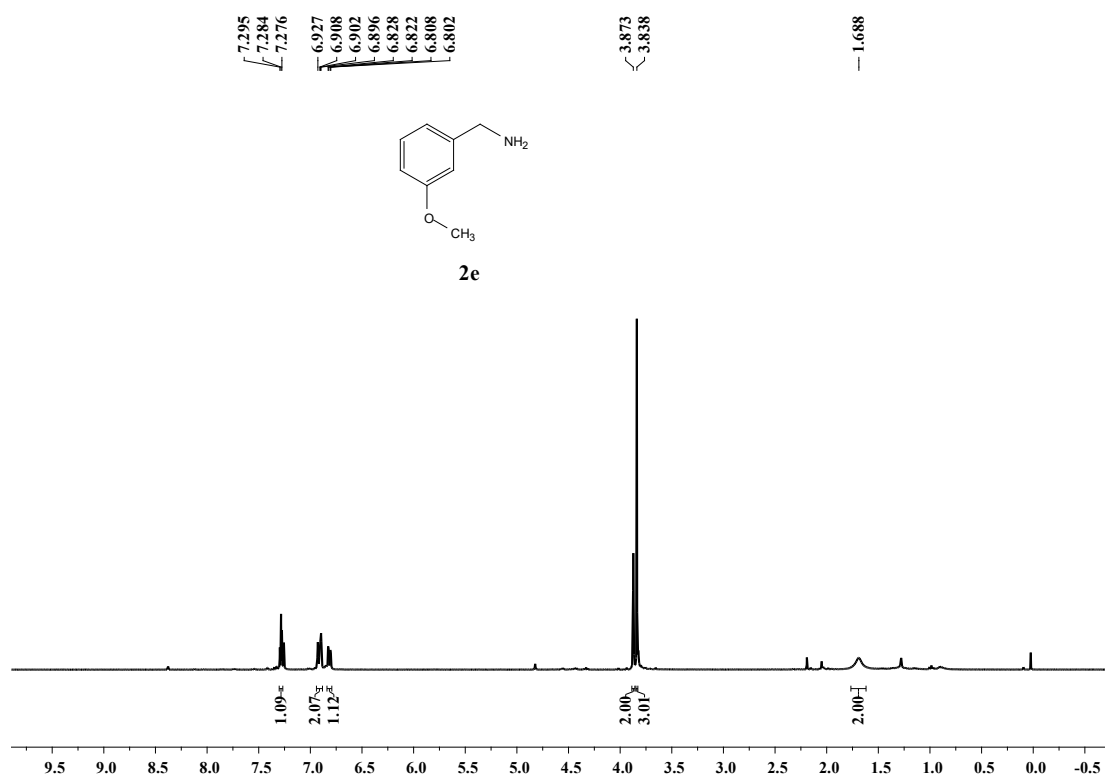

$^{13}\text{C}$  NMR, 100 MHz,  $\text{CDCl}_3$

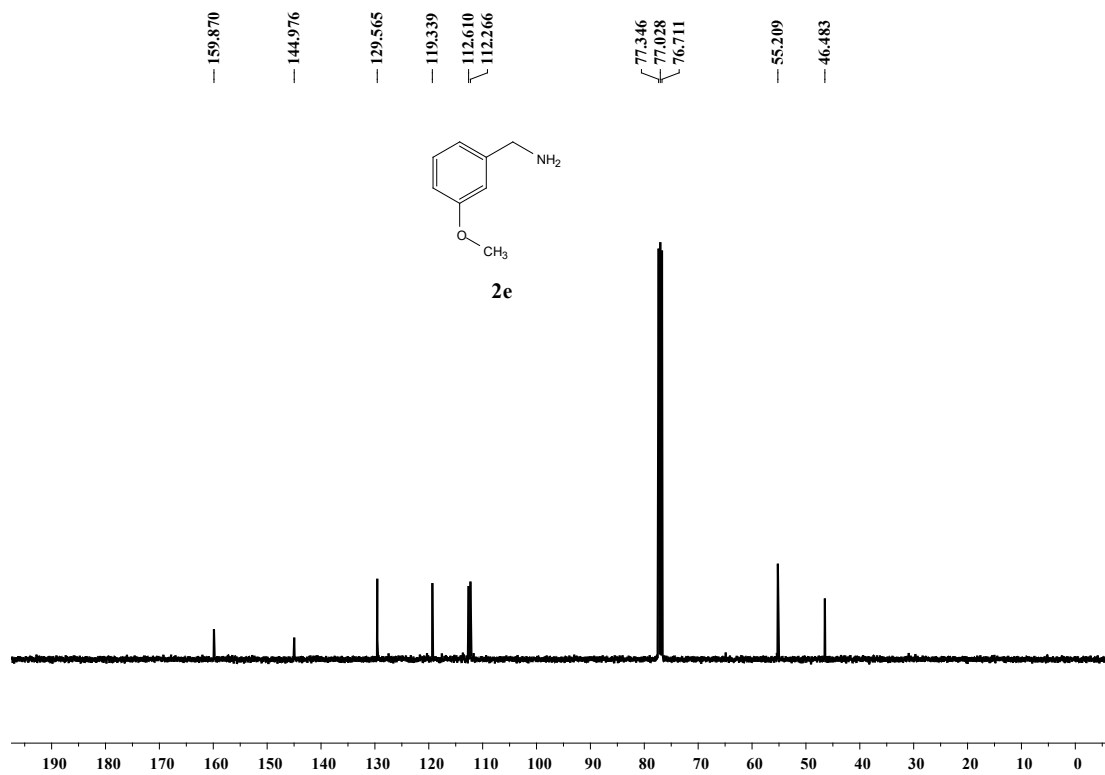

$^1\text{H}$  NMR, 400 MHz,  $\text{CDCl}_3$

7.259  
7.235  
7.224  
7.221  
7.216  
7.206  
6.935  
6.917  
6.898  
6.879  
6.859  
3.850  
3.816  
2.068

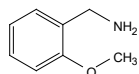

**2f**

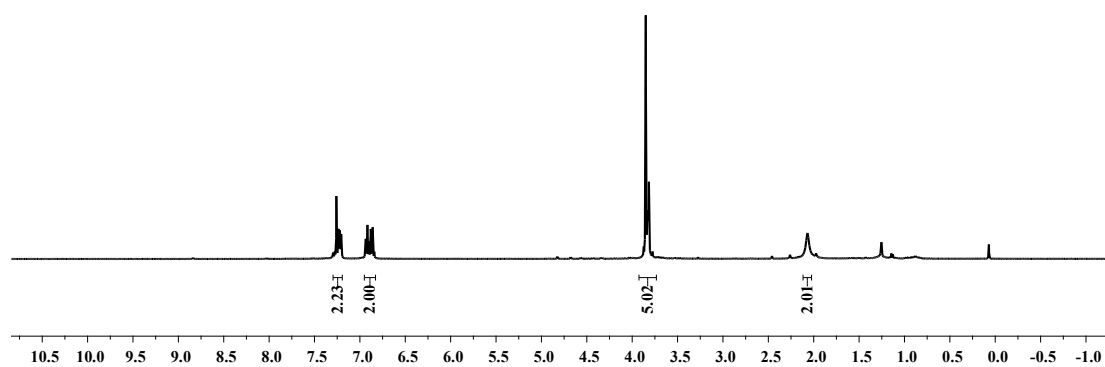

$^{13}\text{C}$  NMR, 100 MHz,  $\text{CDCl}_3$

157.450  
130.011  
128.589  
128.172  
120.557  
110.240  
55.171  
42.564

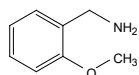

**2f**

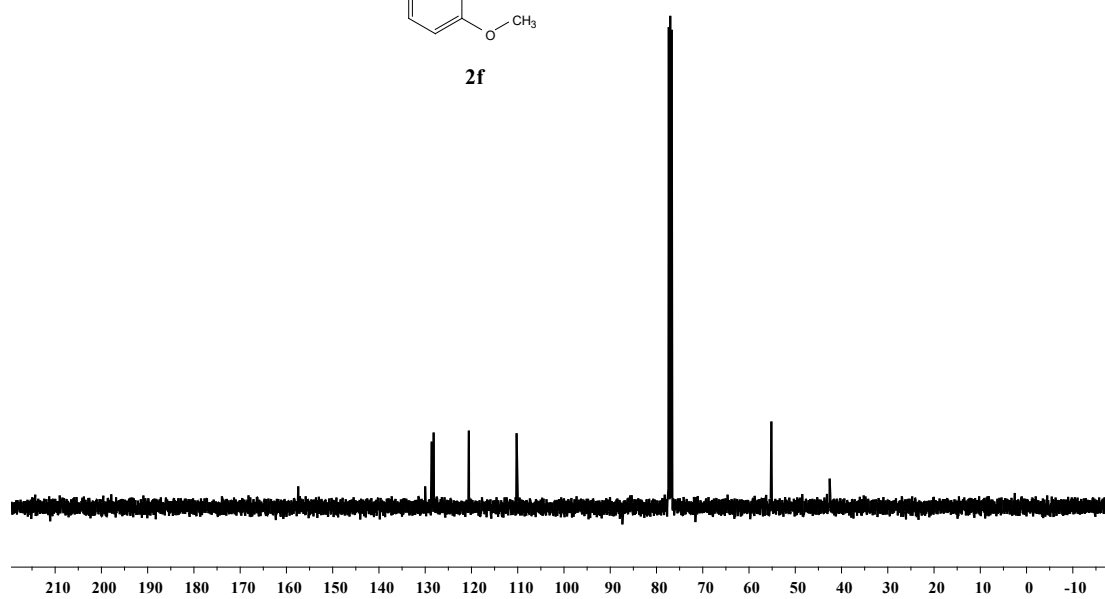

$^1\text{H}$  NMR, 400 MHz,  $\text{CDCl}_3$

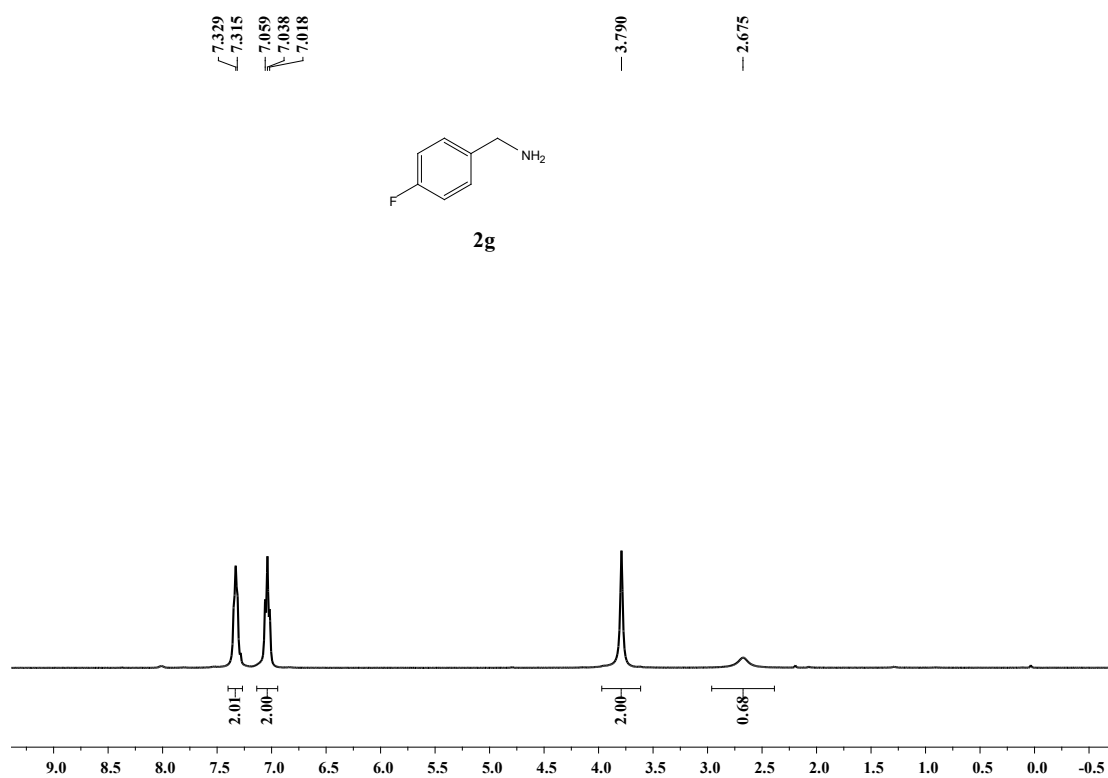

$^{13}\text{C}$  NMR, 100 MHz,  $\text{CDCl}_3$

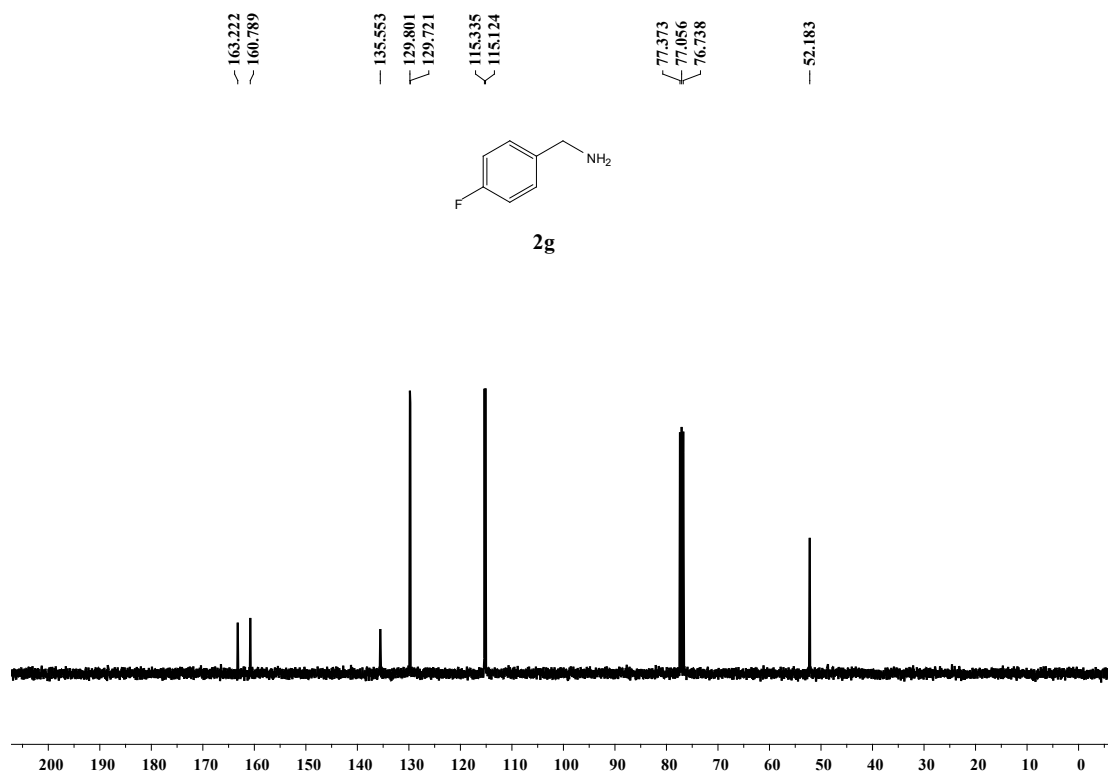

$^1\text{H}$  NMR, 400 MHz,  $\text{CDCl}_3$

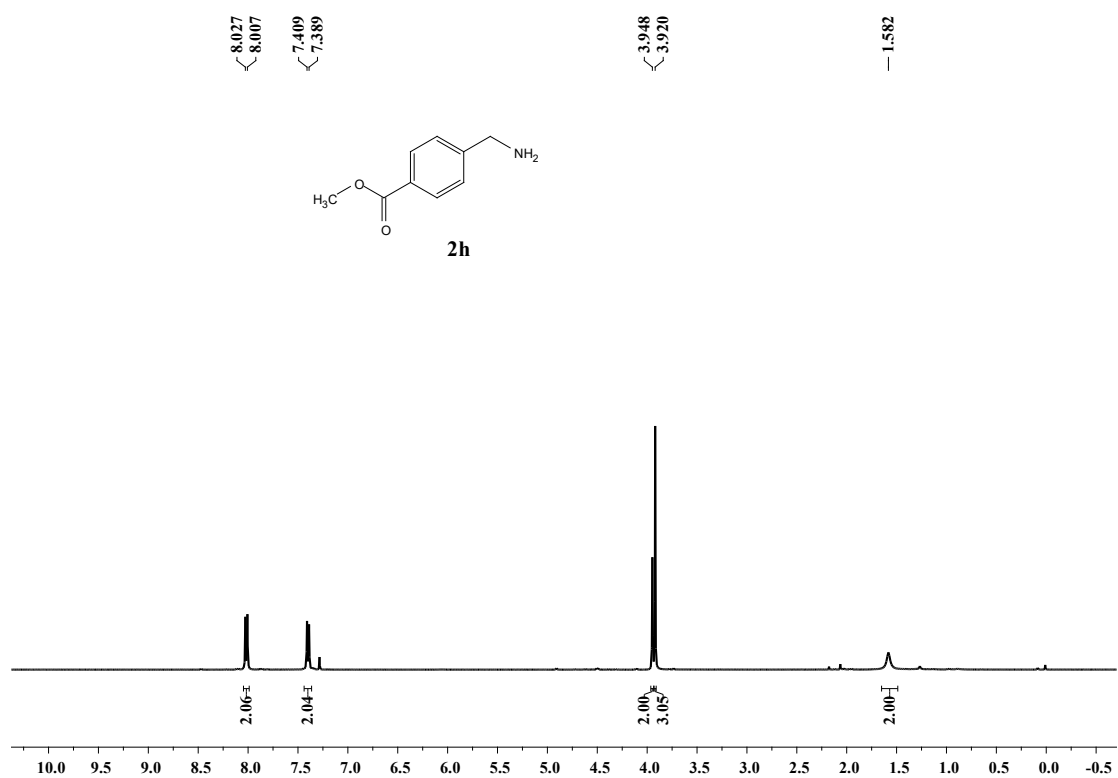

$^{13}\text{C}$  NMR, 100 MHz,  $\text{CDCl}_3$

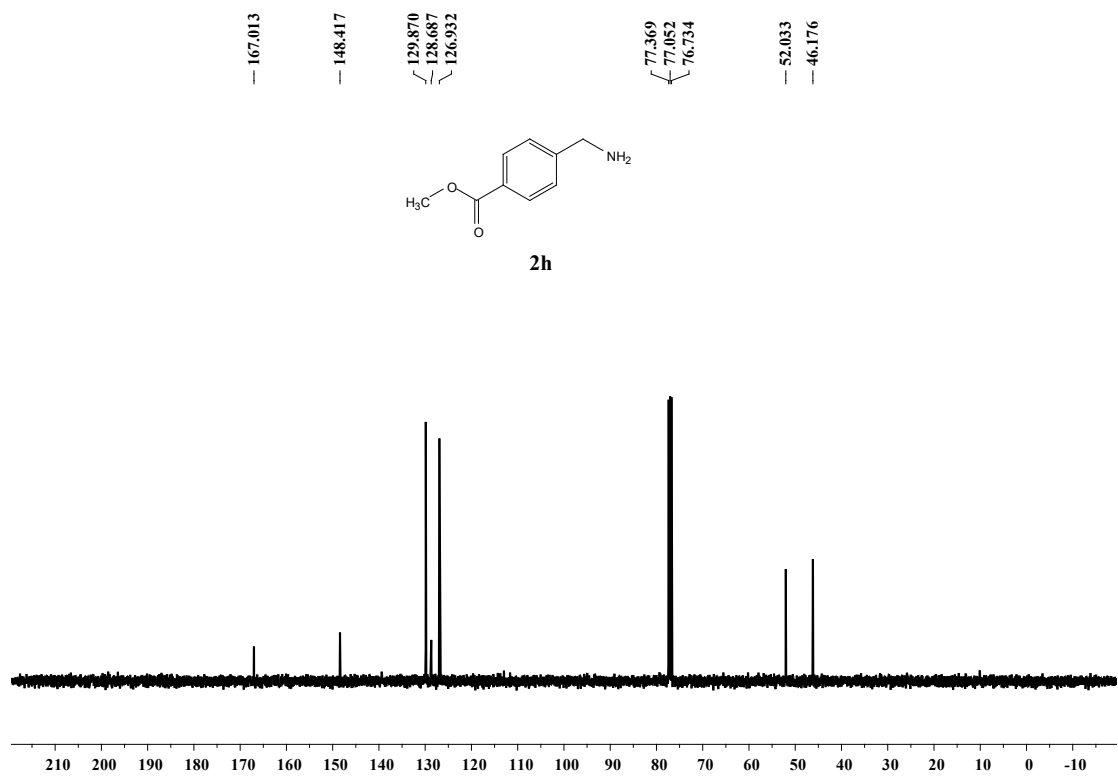

$^1\text{H}$  NMR, 400 MHz,  $\text{CD}_3\text{CN}$

7.306  
7.357  
7.350  
7.345  
7.339  
— 6.498  
— 4.060

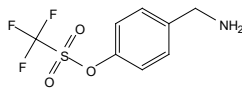

**2i**

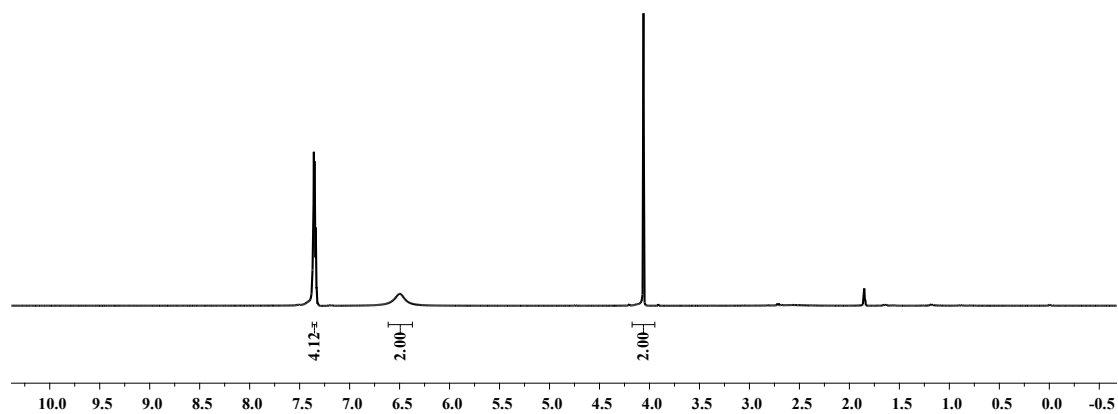

$^{13}\text{C}$  NMR, 100 MHz,  $\text{CD}_3\text{CN}$

131.865  
128.955  
128.943  
128.677  
— 124.250  
— 121.708  
— 119.166  
— 117.099  
— 116.624  
— 43.314

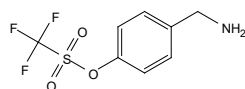

**2i**

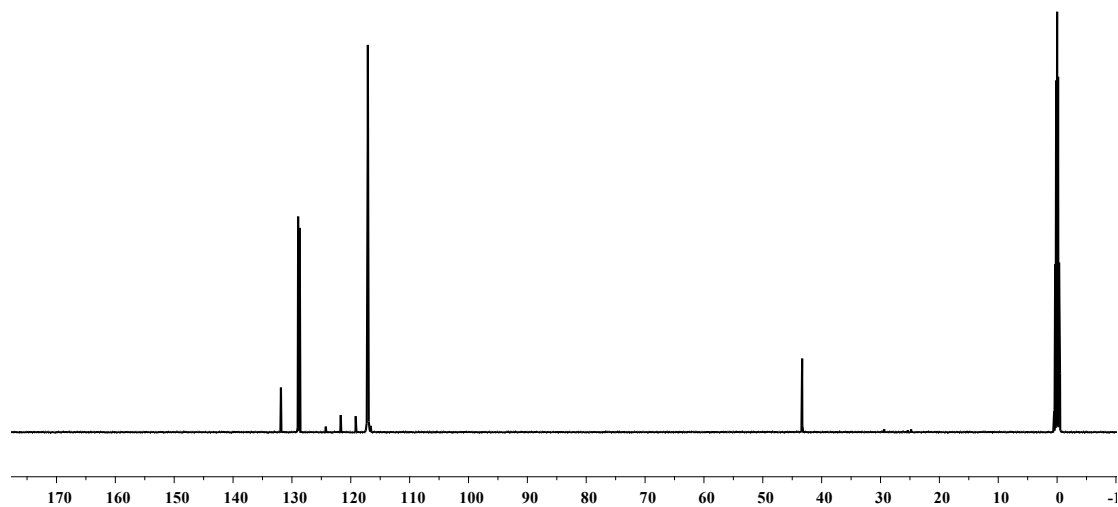

$^1\text{H}$  NMR, 400 MHz,  $\text{CDCl}_3$

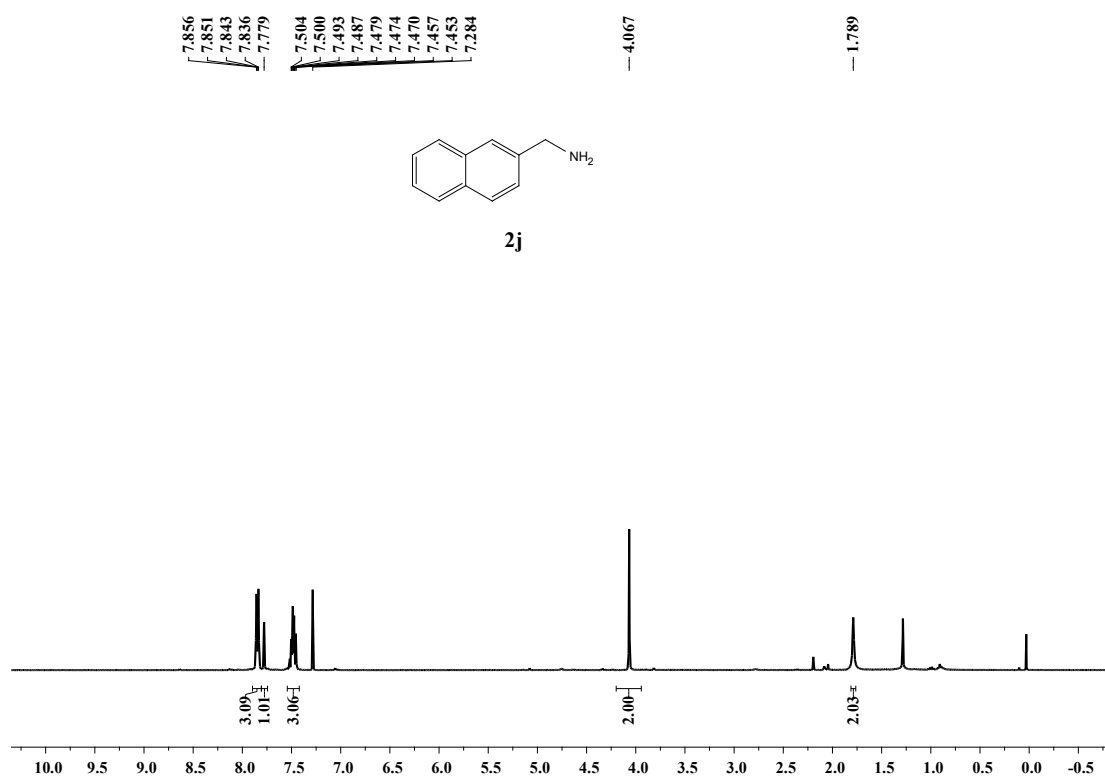

$^{13}\text{C}$  NMR, 100 MHz,  $\text{CDCl}_3$

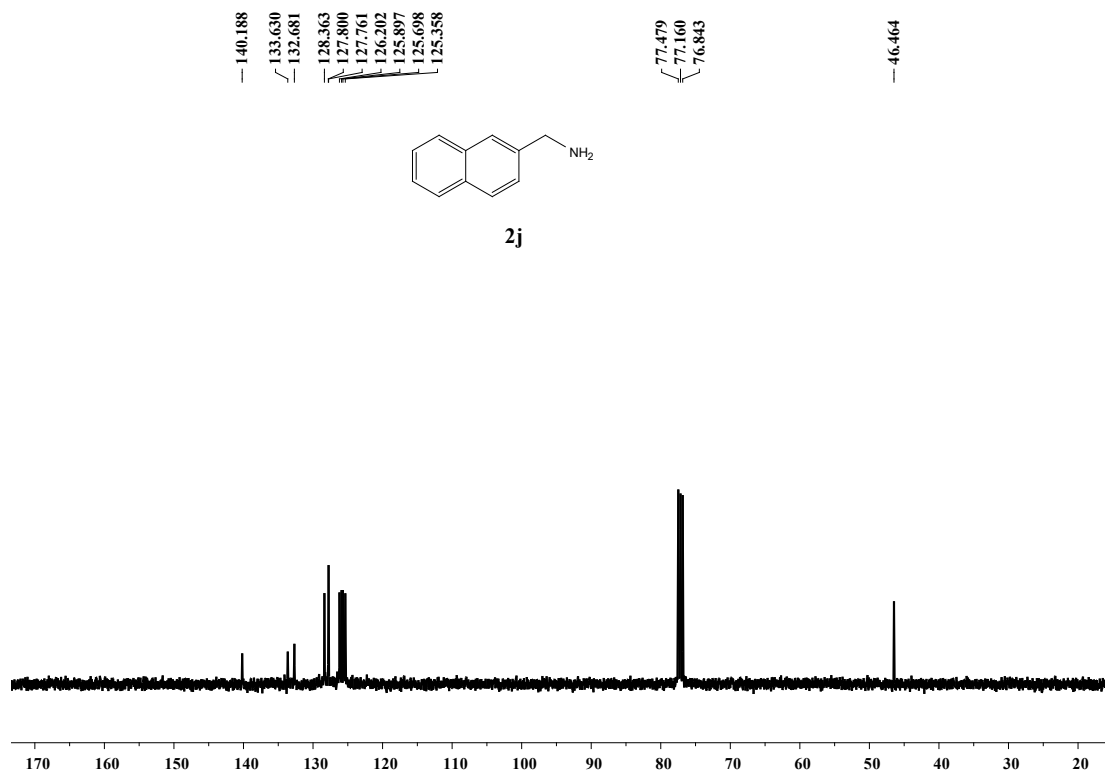

$^1\text{H}$  NMR, 400 MHz,  $\text{CDCl}_3$

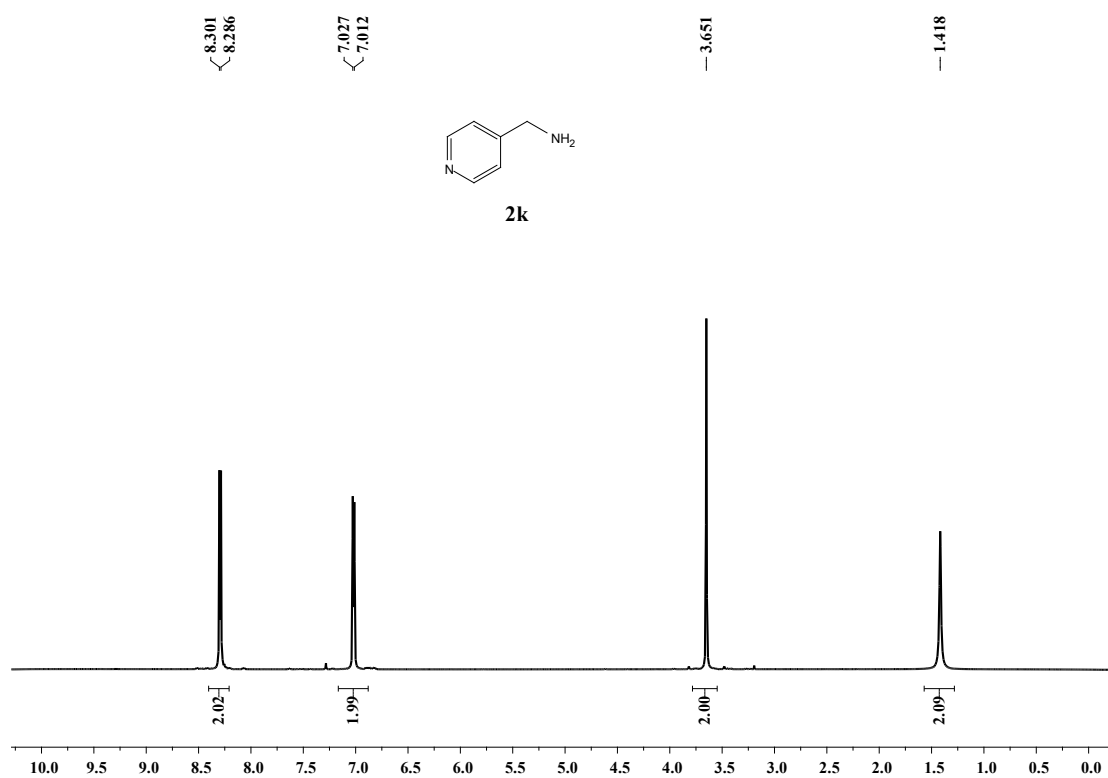

$^{13}\text{C}$  NMR, 100 MHz,  $\text{CDCl}_3$

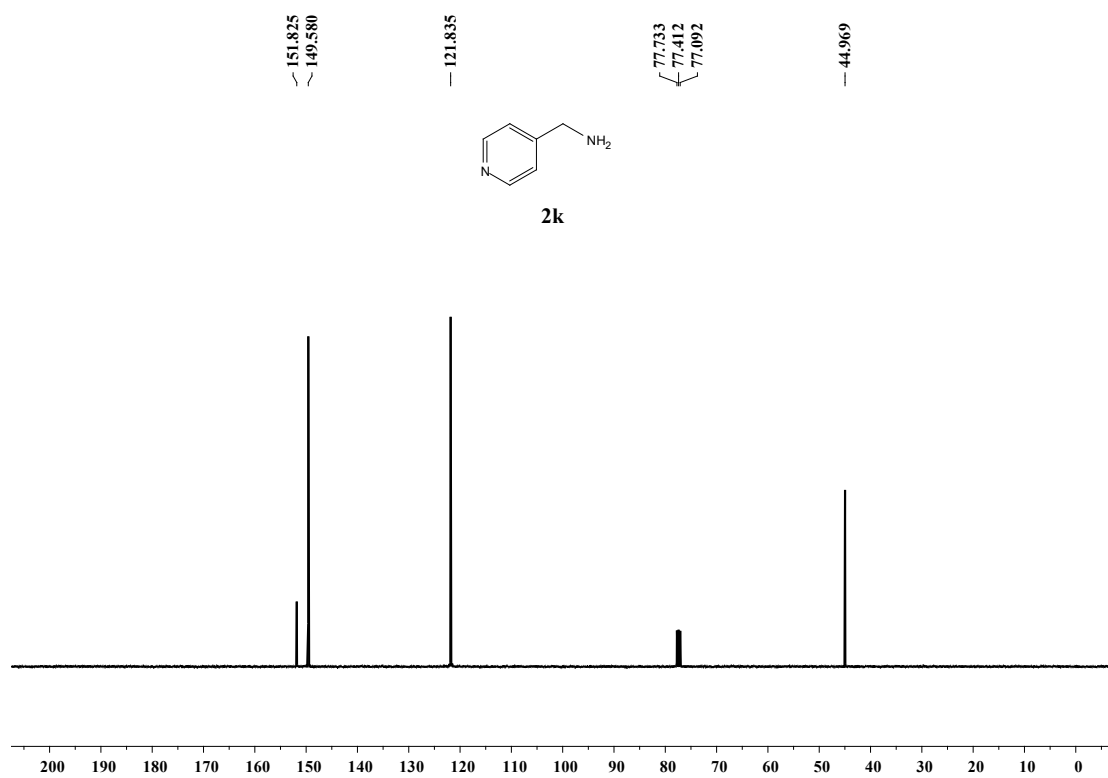



$^1\text{H}$  NMR, 400 MHz,  $\text{CDCl}_3$

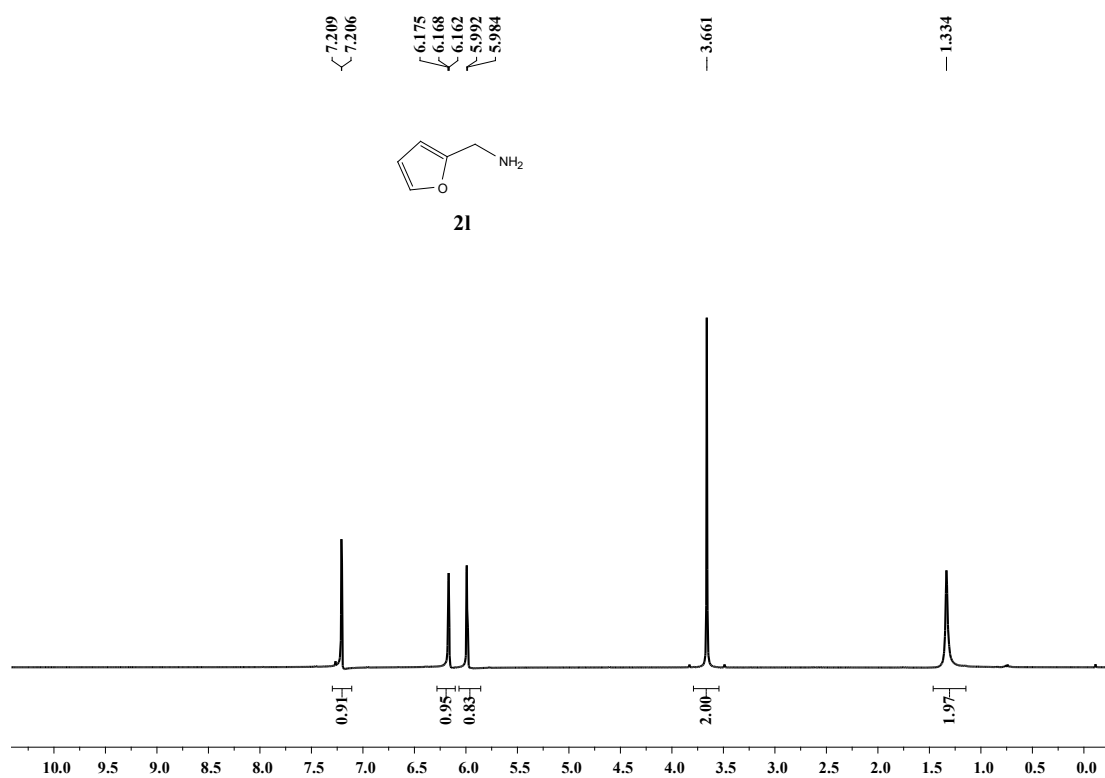

$^{13}\text{C}$  NMR, 100 MHz,  $\text{CDCl}_3$

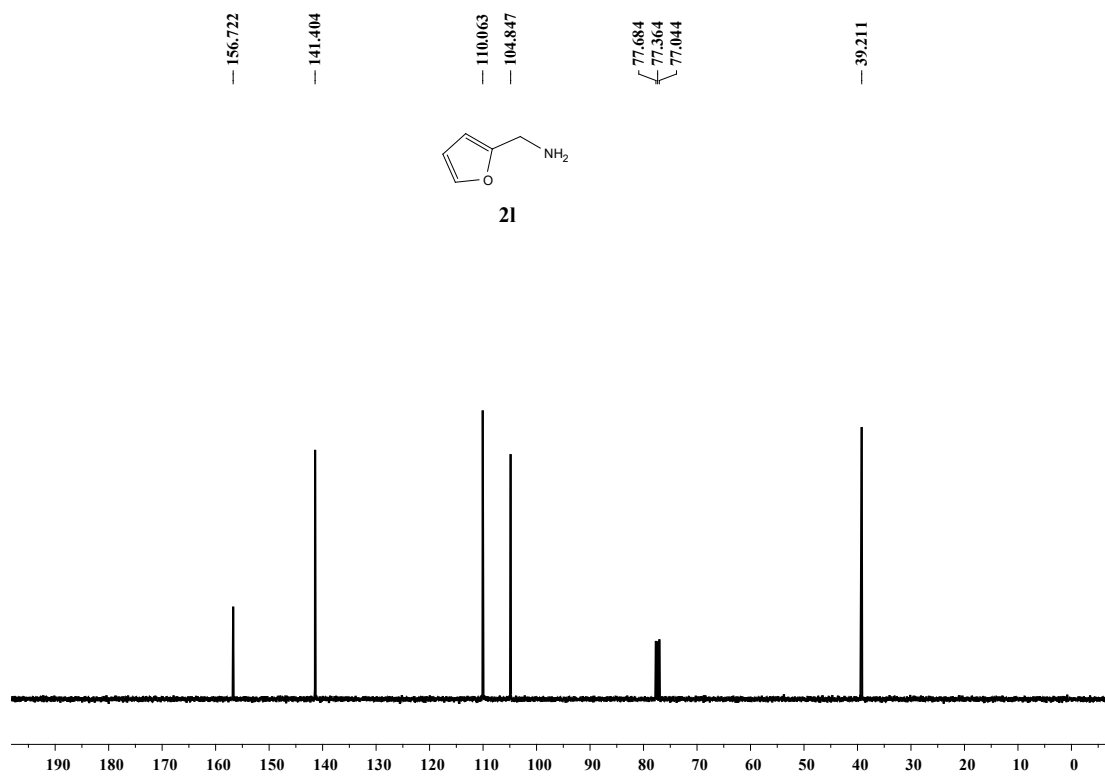

$^1\text{H}$  NMR, 400 MHz,  $\text{CDCl}_3$

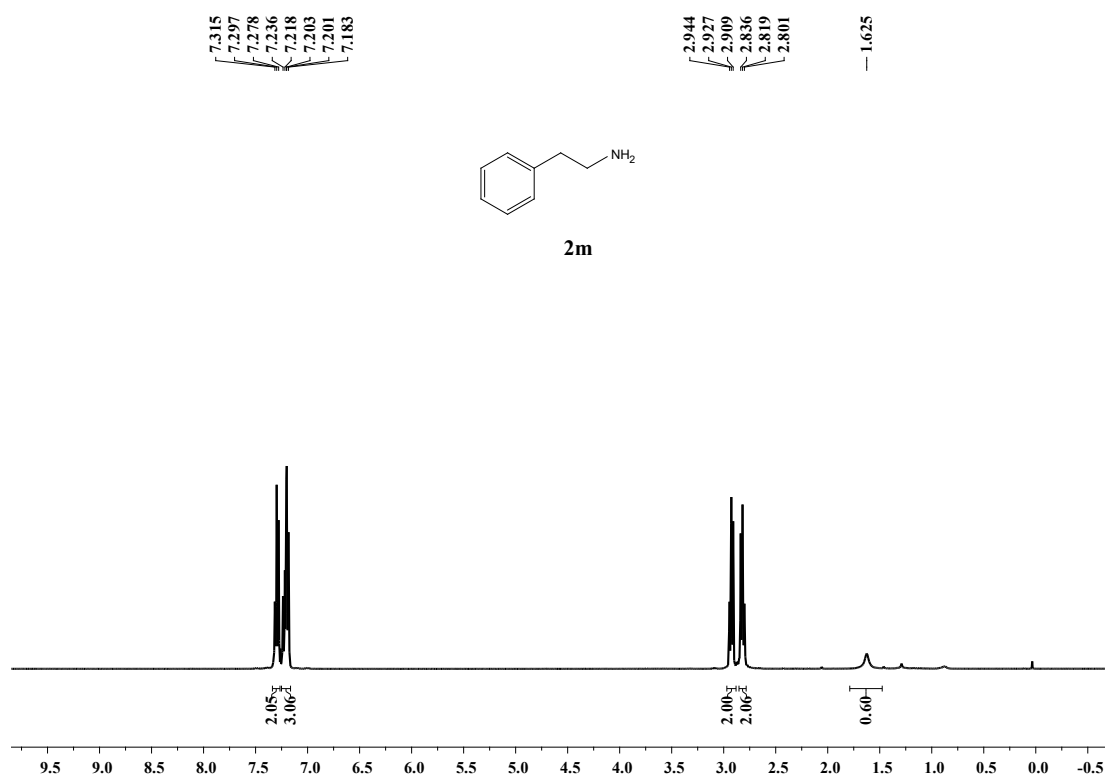

$^{13}\text{C}$  NMR, 100 MHz,  $\text{CDCl}_3$

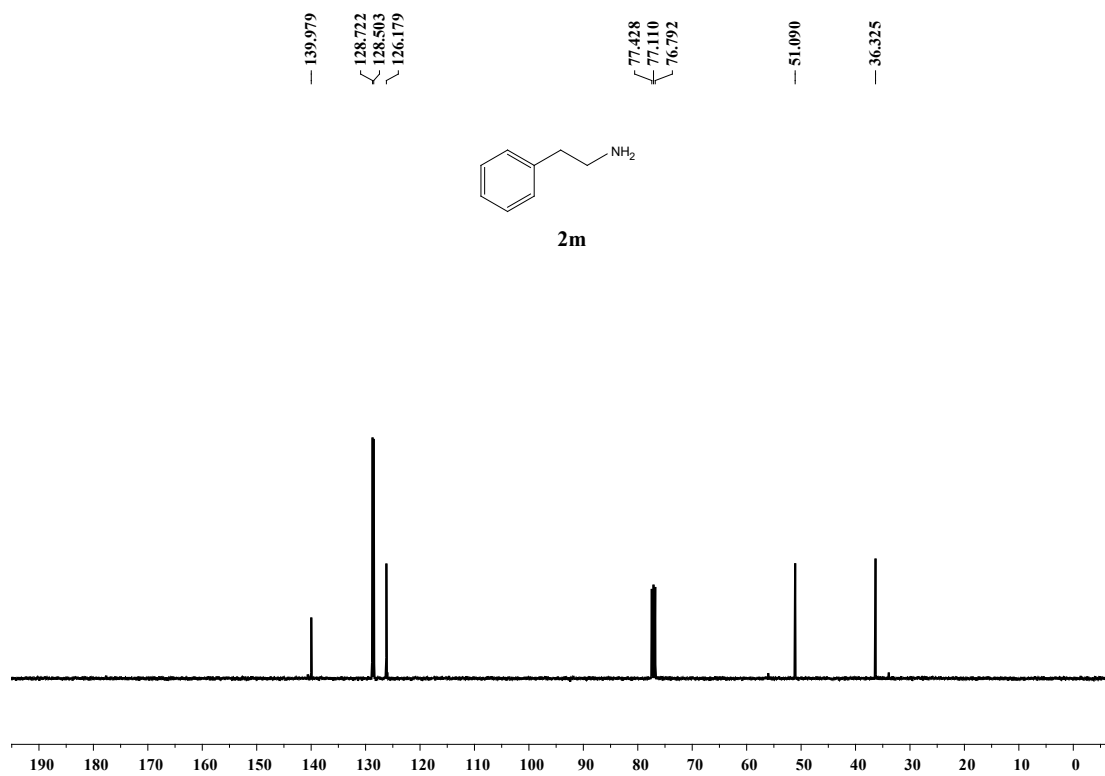

$^1\text{H}$  NMR, 400 MHz,  $\text{CDCl}_3$

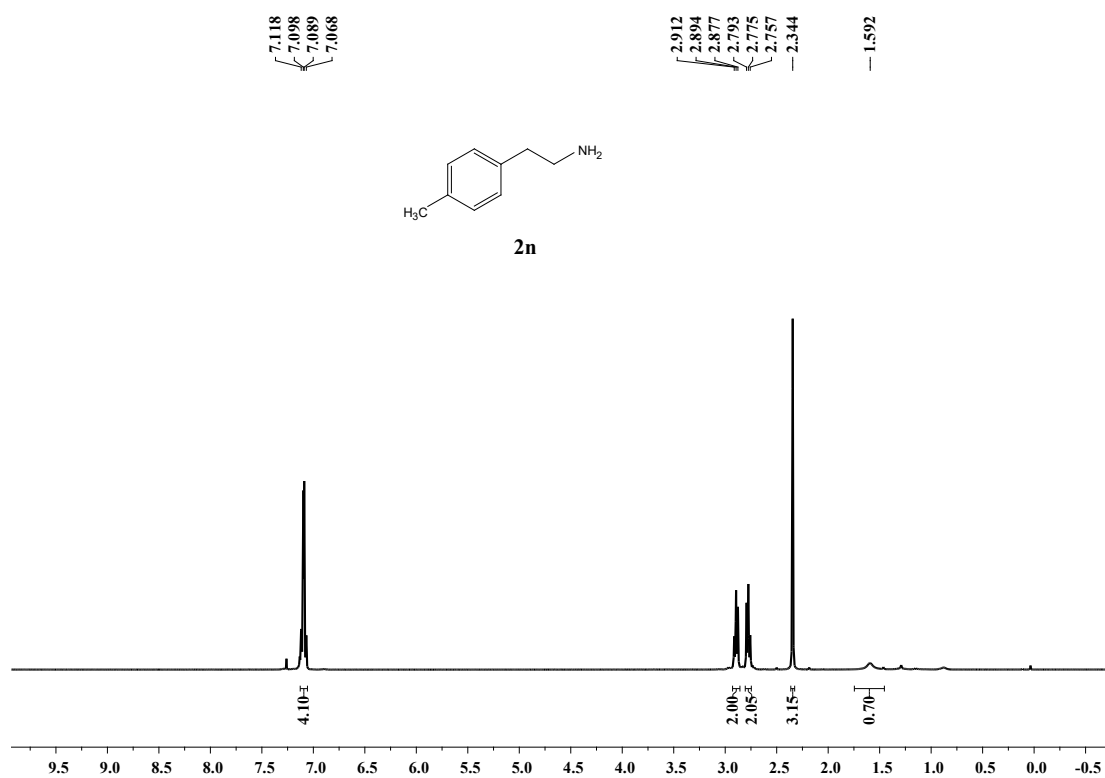

$^{13}\text{C}$  NMR, 100 MHz,  $\text{CDCl}_3$

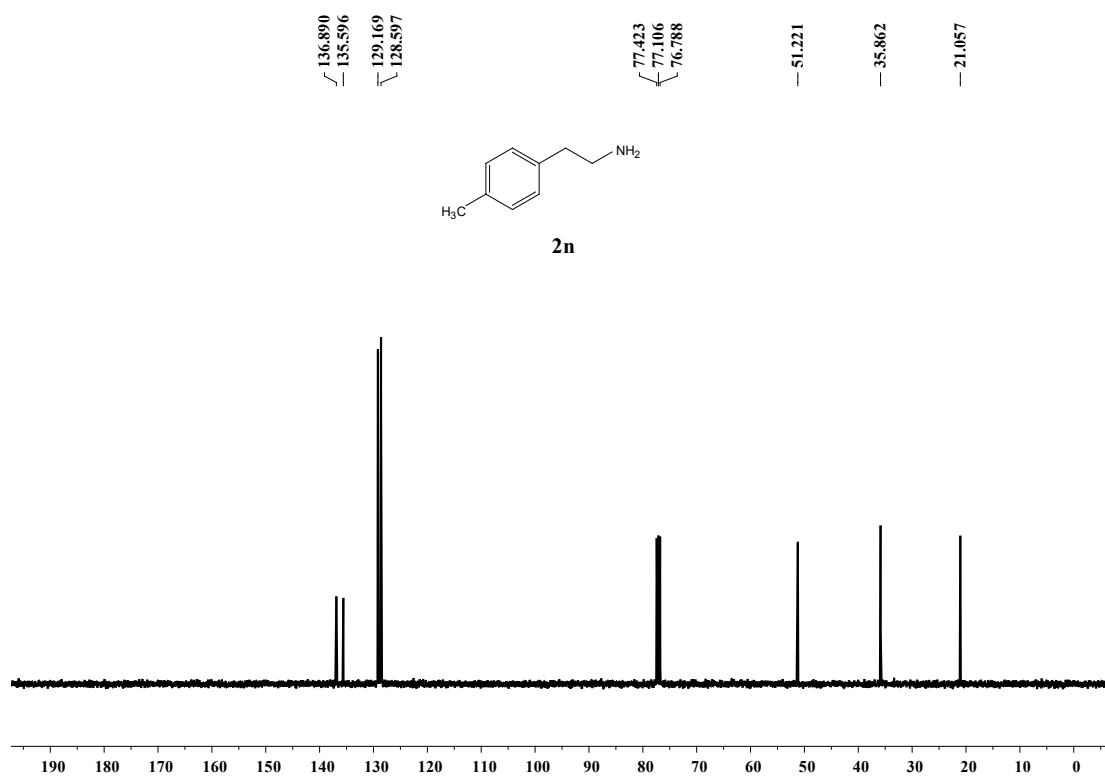

$^1\text{H}$  NMR, 400 MHz,  $\text{CDCl}_3$

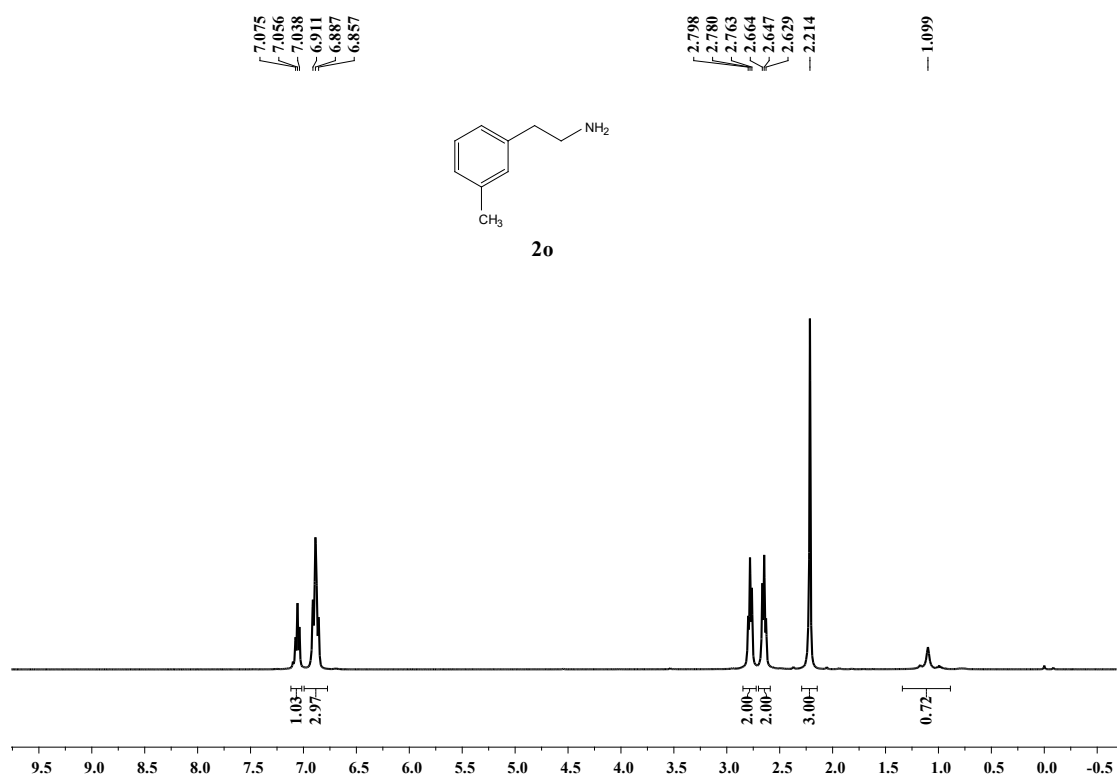

$^{13}\text{C}$  NMR, 100 MHz,  $\text{CDCl}_3$

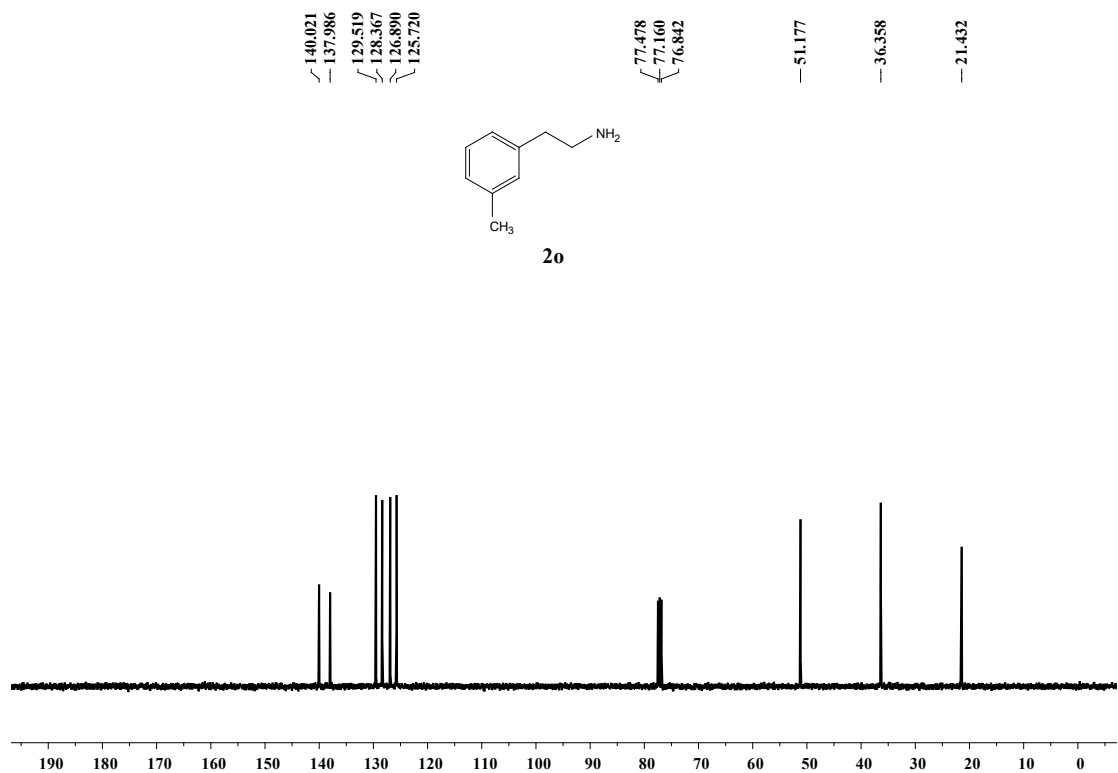

$^1\text{H}$  NMR, 400 MHz,  $\text{CDCl}_3$

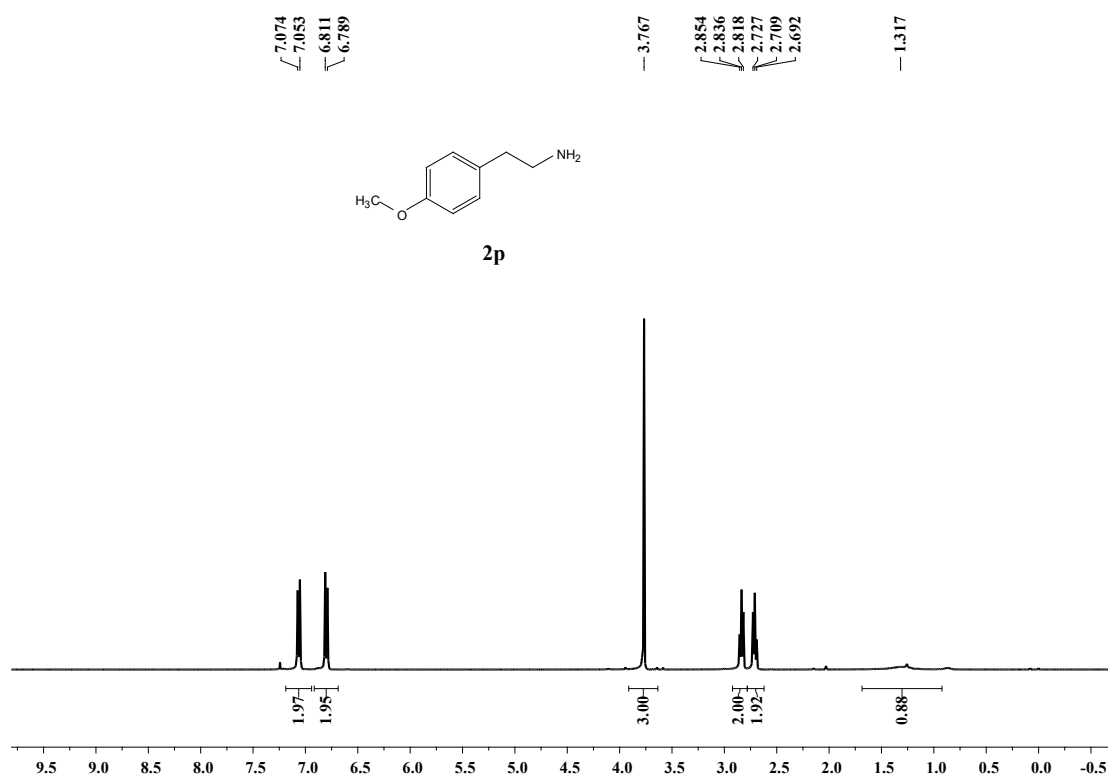

$^{13}\text{C}$  NMR, 100 MHz,  $\text{CDCl}_3$

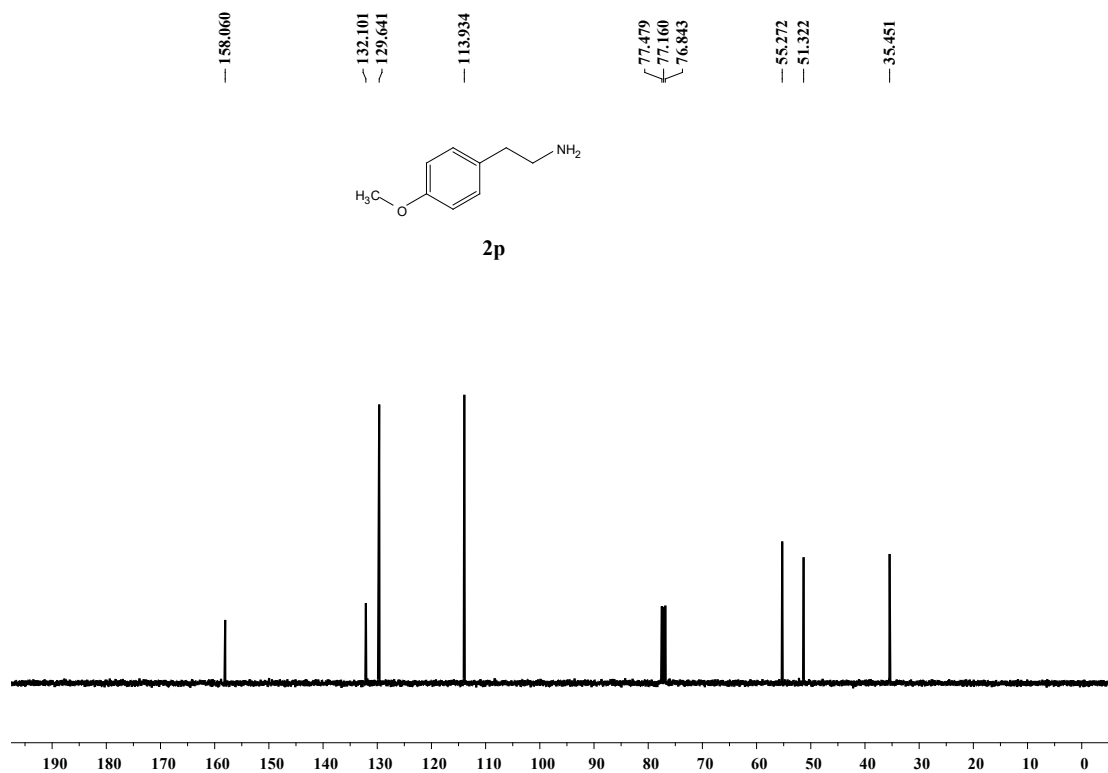

$^1\text{H}$  NMR, 400 MHz,  $\text{CDCl}_3$

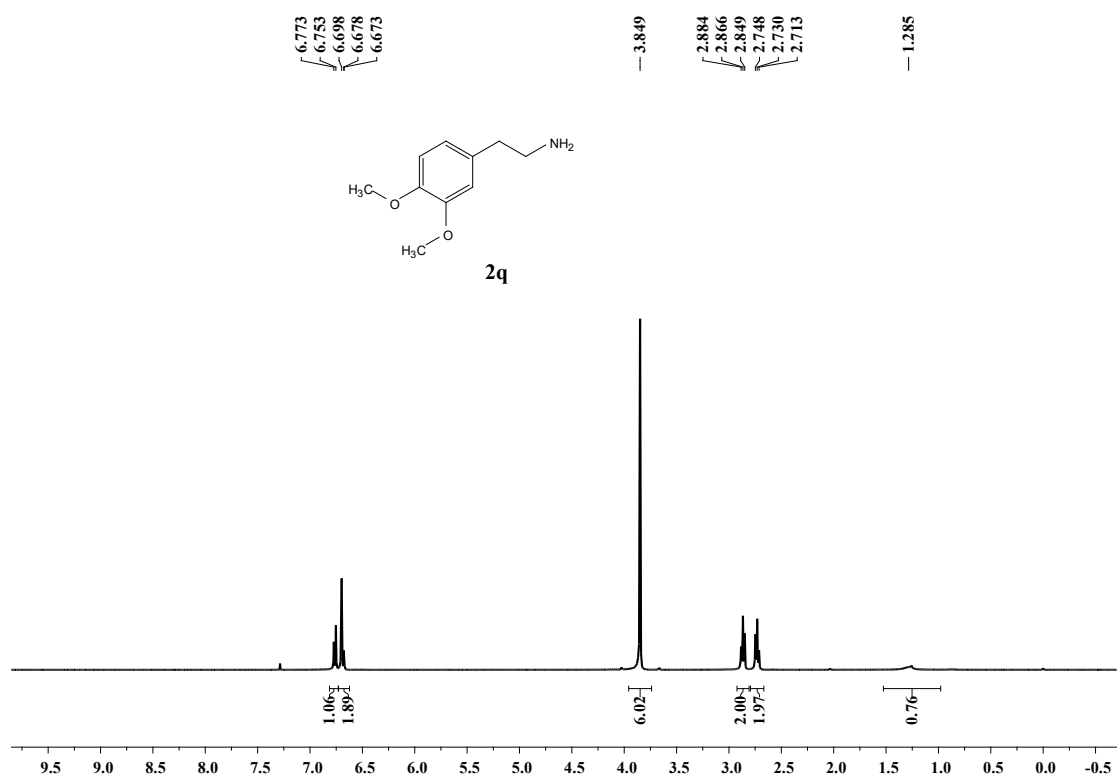

$^{13}\text{C}$  NMR, 100 MHz,  $\text{CDCl}_3$

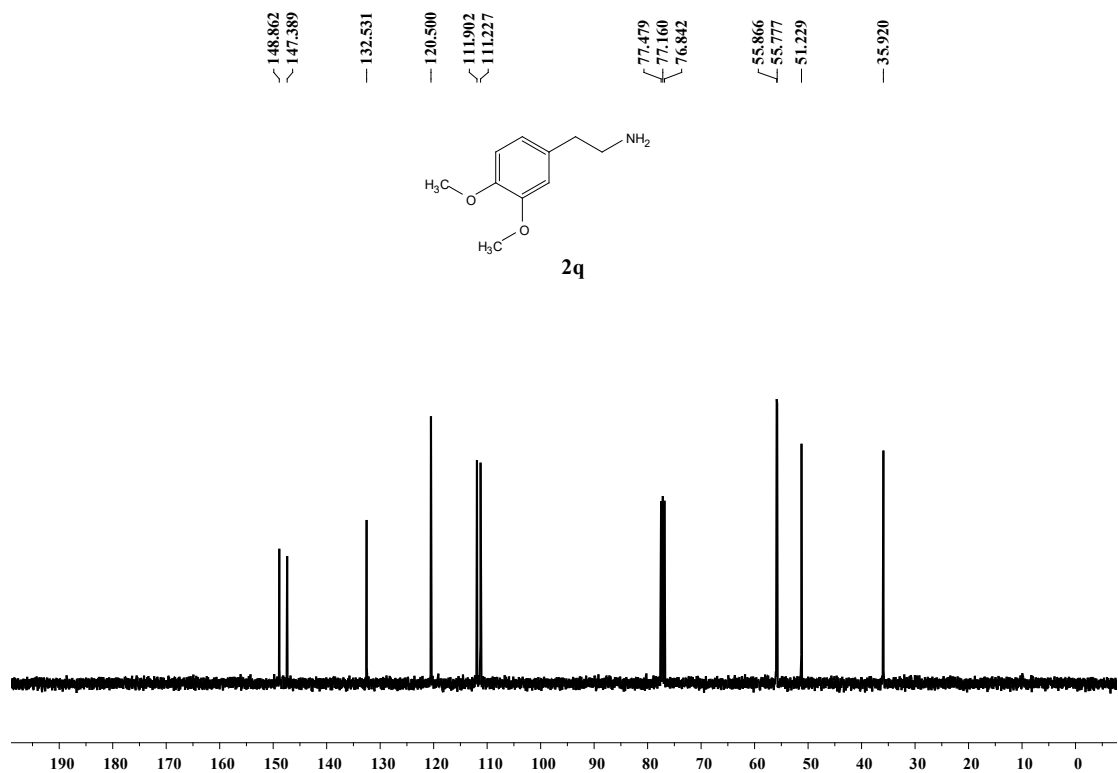

$^1\text{H}$  NMR, 400 MHz,  $\text{CDCl}_3$

7.148  
7.143  
7.134  
7.127  
7.118  
7.113  
6.996  
6.991  
6.979  
6.974  
6.969  
6.958  
6.952

2.900  
2.882  
2.865  
2.789  
2.772  
2.754

— 1.335

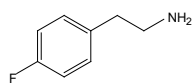

**2r**

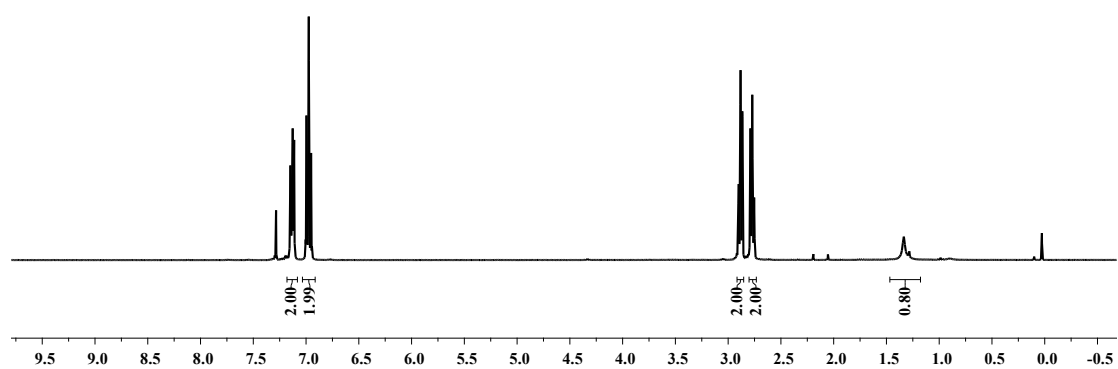

$^{13}\text{C}$  NMR, 100 MHz,  $\text{CDCl}_3$

162.805  
160.381

135.689  
135.657  
130.167  
130.089

115.439  
115.229

77.477  
77.160  
76.842

— 51.178

— 35.612

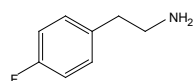

**2r**

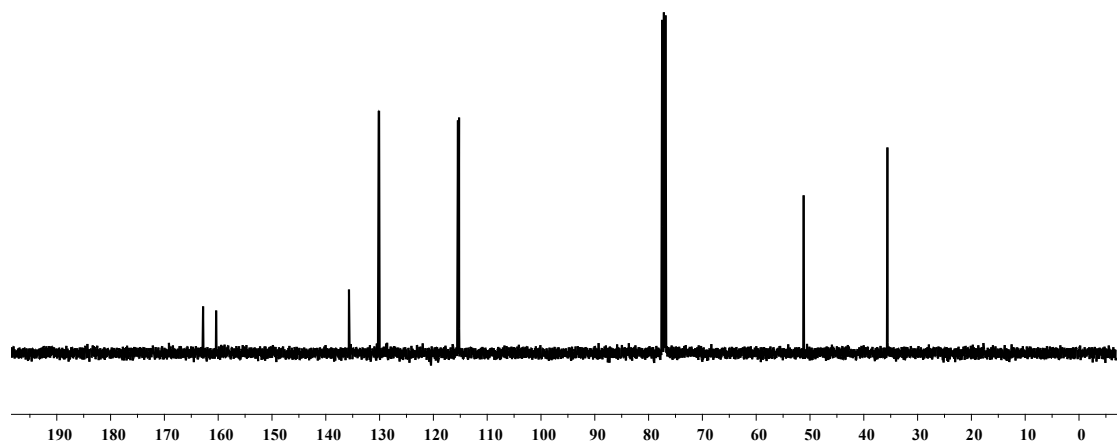

$^1\text{H}$  NMR, 400 MHz,  $\text{CDCl}_3$

7.5345  
7.5225  
7.290  
7.271

2.929  
2.914  
2.866  
2.851

1.375

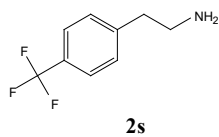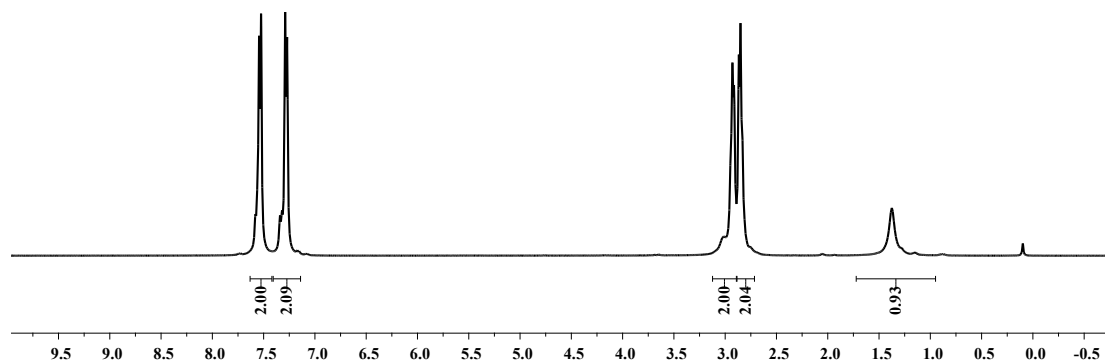

$^{13}\text{C}$  NMR, 100 MHz,  $\text{CDCl}_3$

144.067  
129.130  
128.969  
128.780  
128.458  
128.136  
125.622  
125.377  
125.340  
122.920

77.342  
77.025  
76.707

50.536

36.134

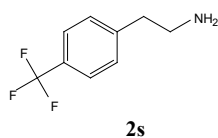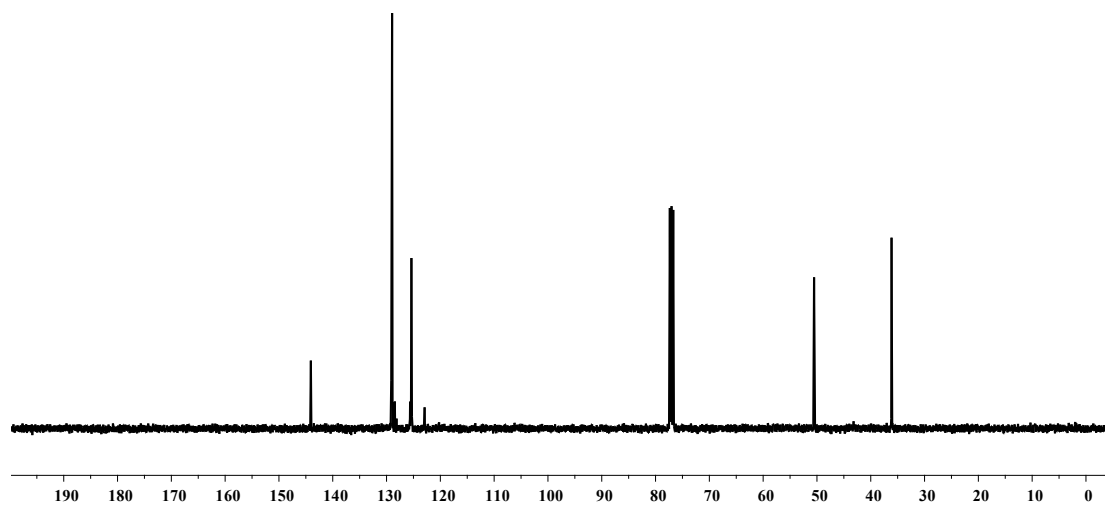



$^1\text{H}$  NMR, 400 MHz,  $\text{CDCl}_3$

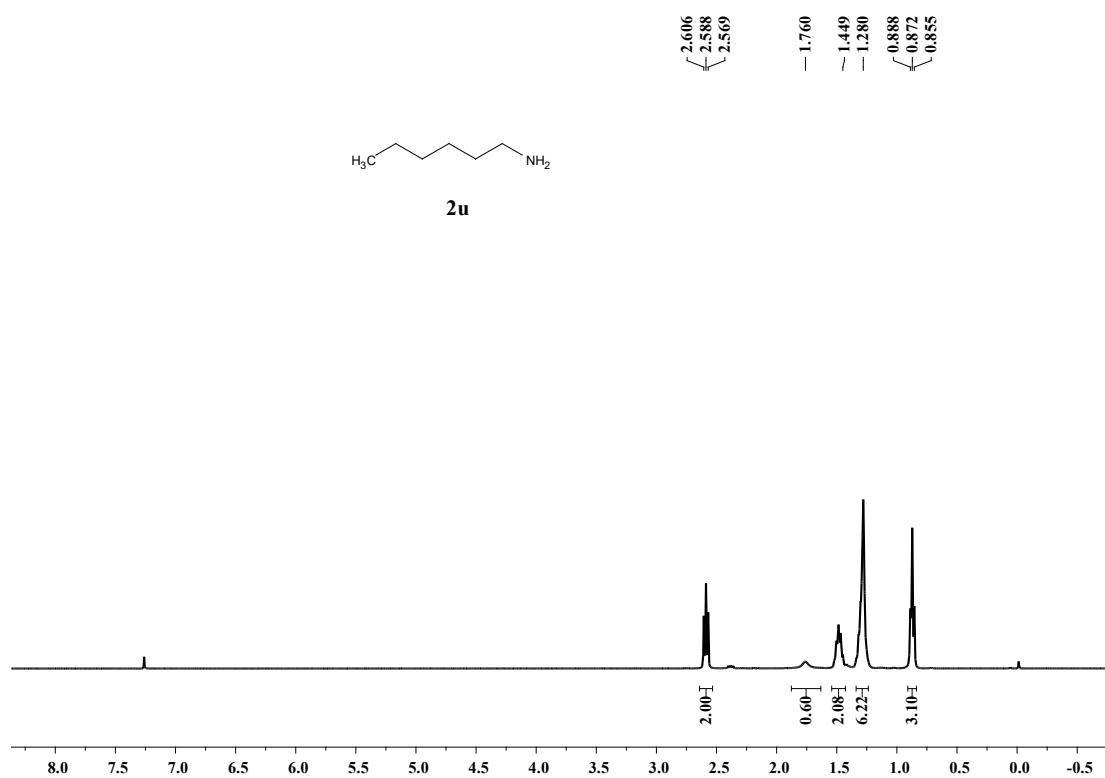

$^{13}\text{C}$  NMR, 100 MHz,  $\text{CDCl}_3$

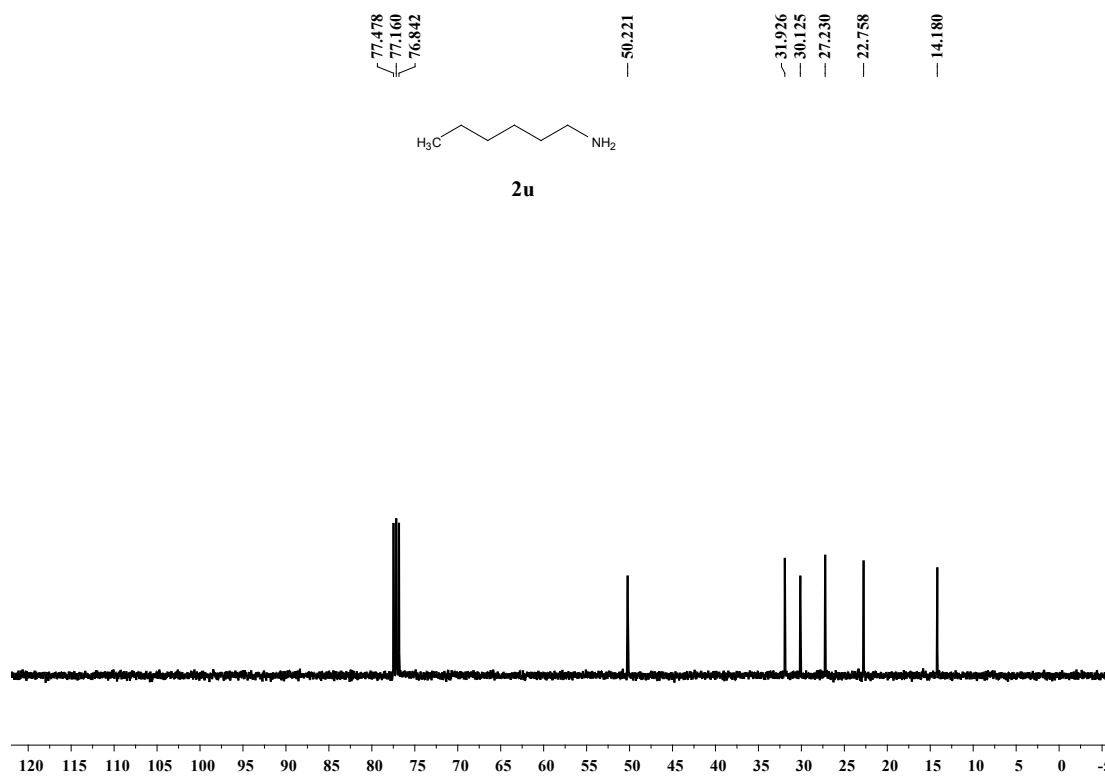

$^1\text{H}$  NMR, 400 MHz,  $\text{CDCl}_3$

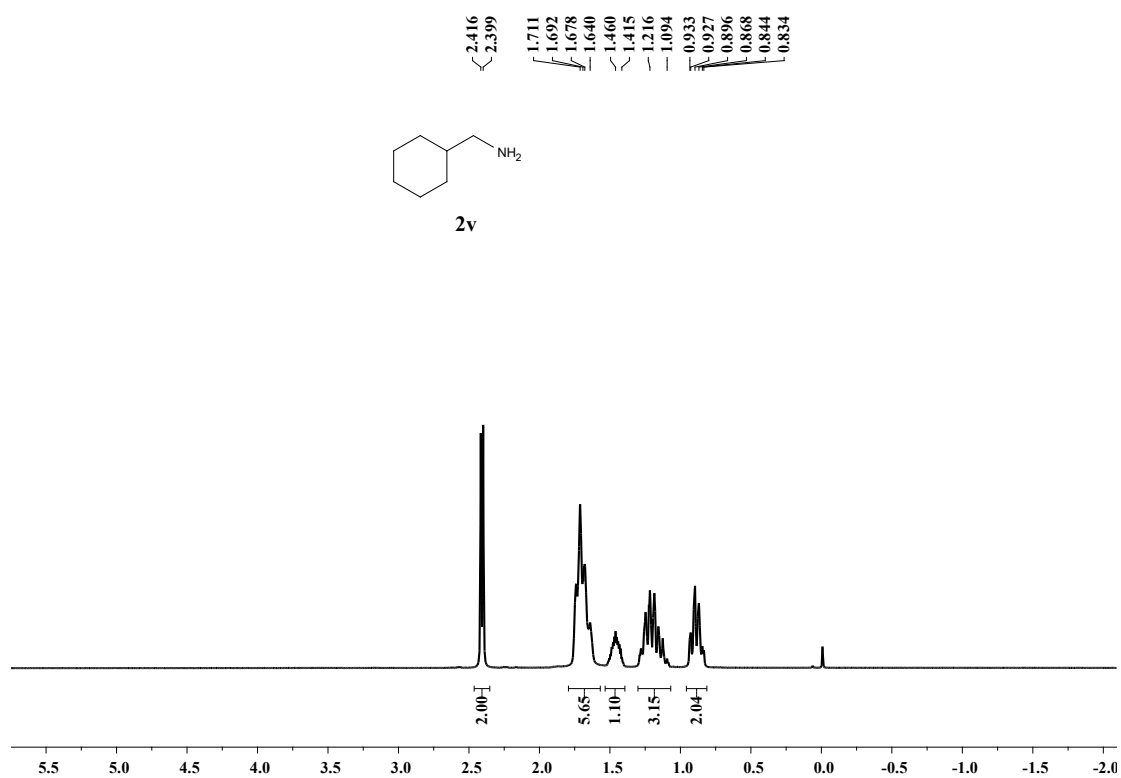

$^{13}\text{C}$  NMR, 100 MHz,  $\text{CDCl}_3$

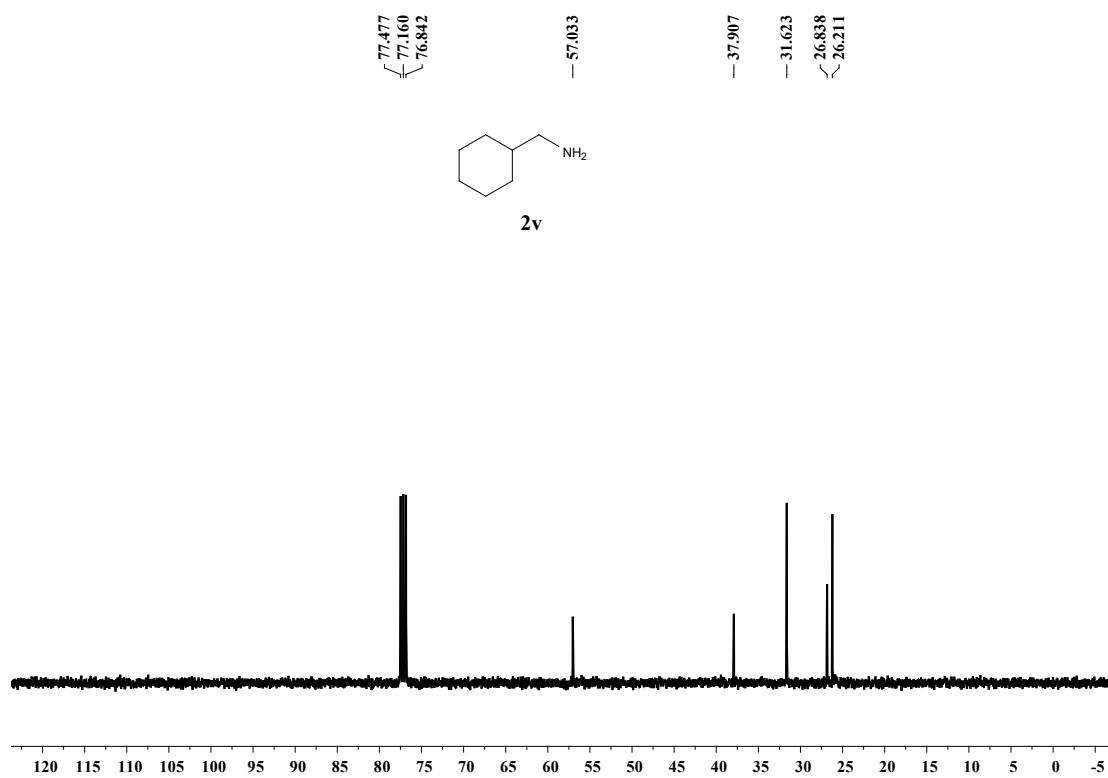

$^1\text{H}$  NMR, 400 MHz,  $\text{CDCl}_3$

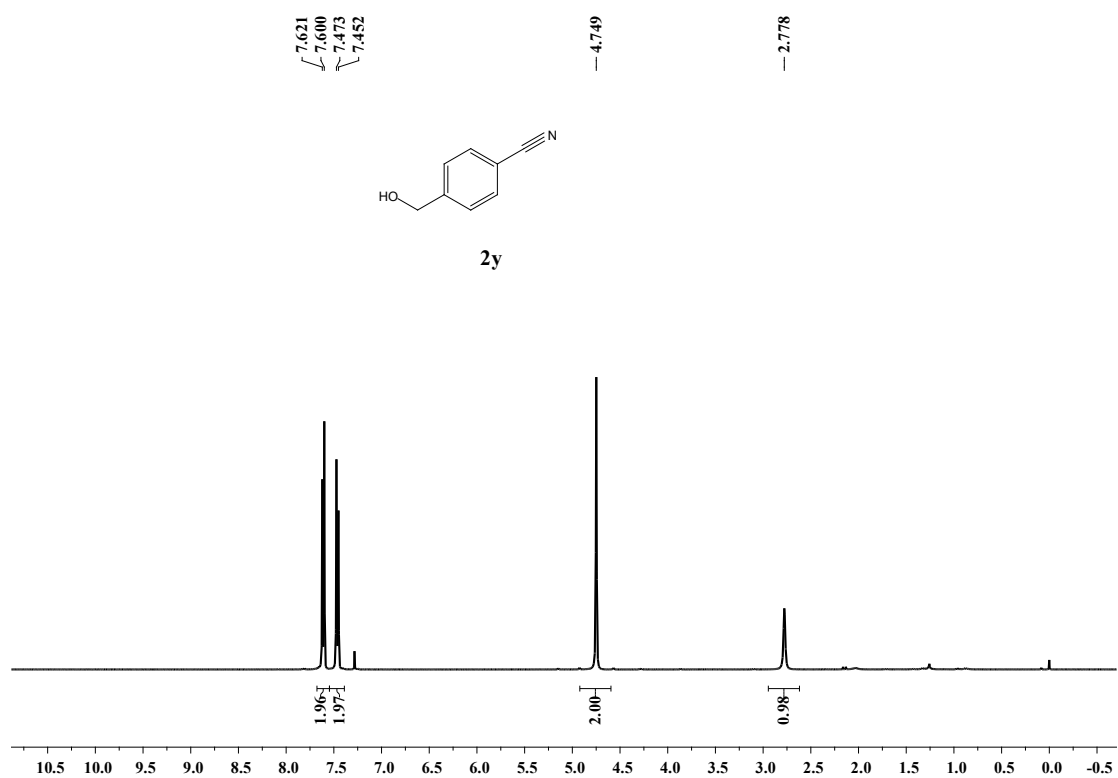

$^{13}\text{C}$  NMR, 100 MHz,  $\text{CDCl}_3$

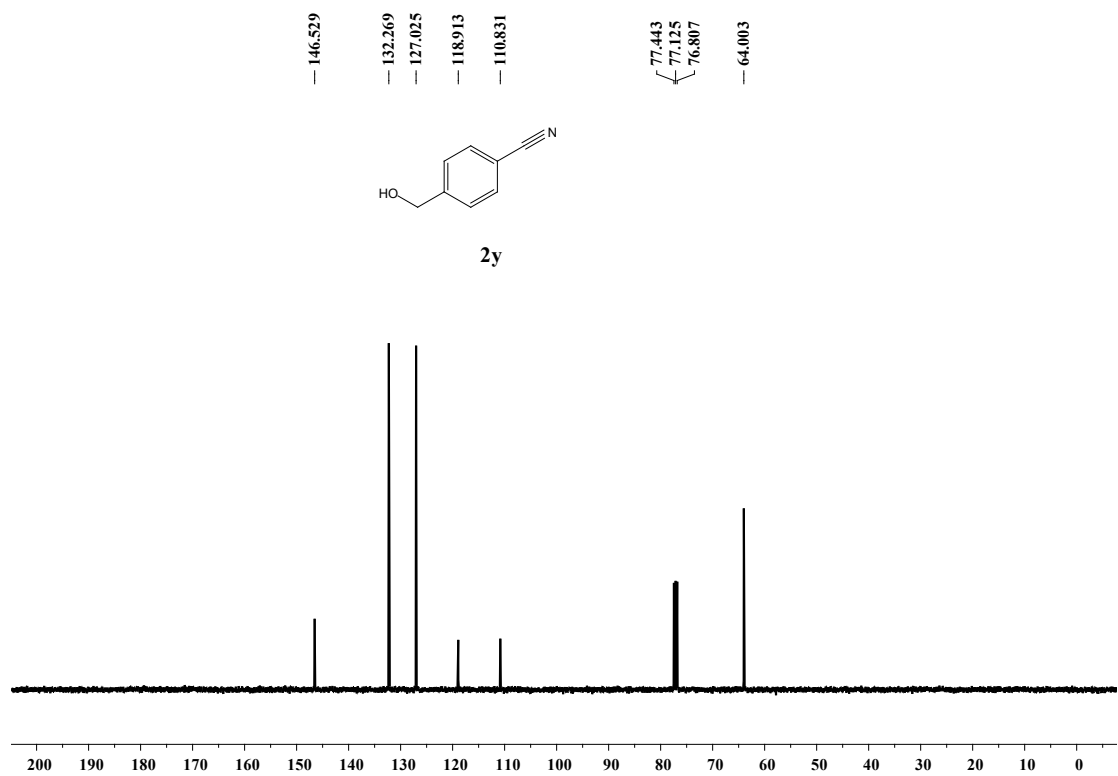

$^1\text{H}$  NMR, 400 MHz,  $\text{CDCl}_3$

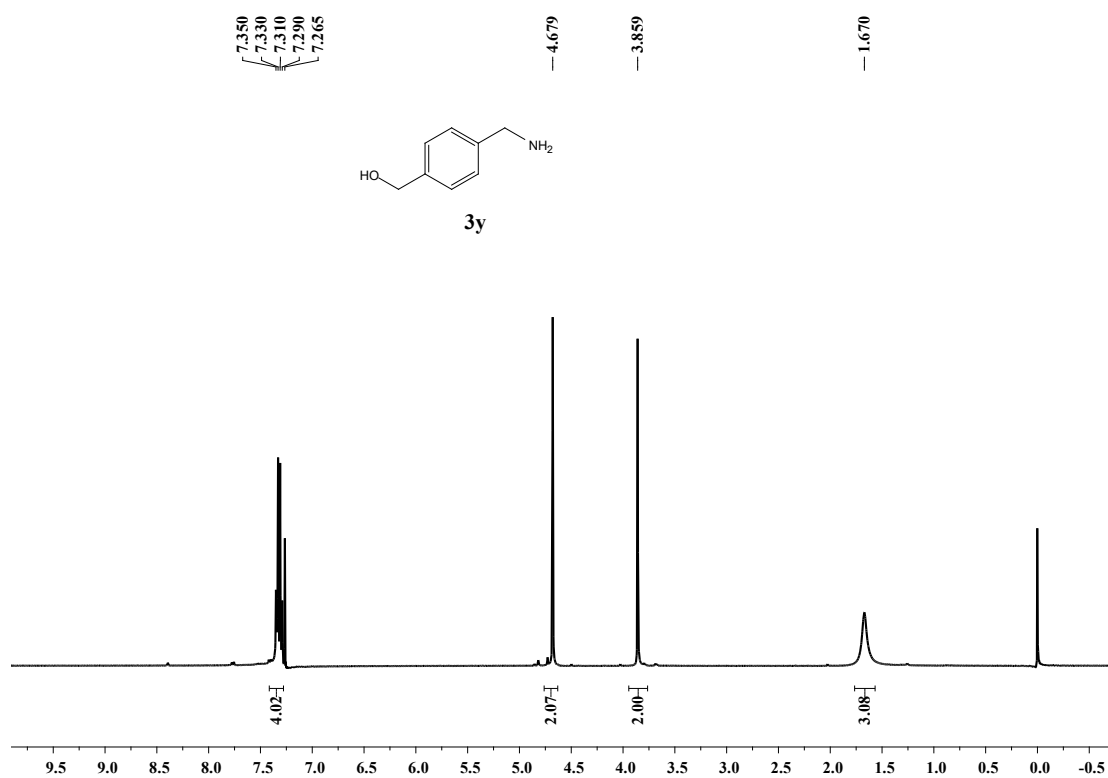

$^{13}\text{C}$  NMR, 100 MHz,  $\text{CDCl}_3$

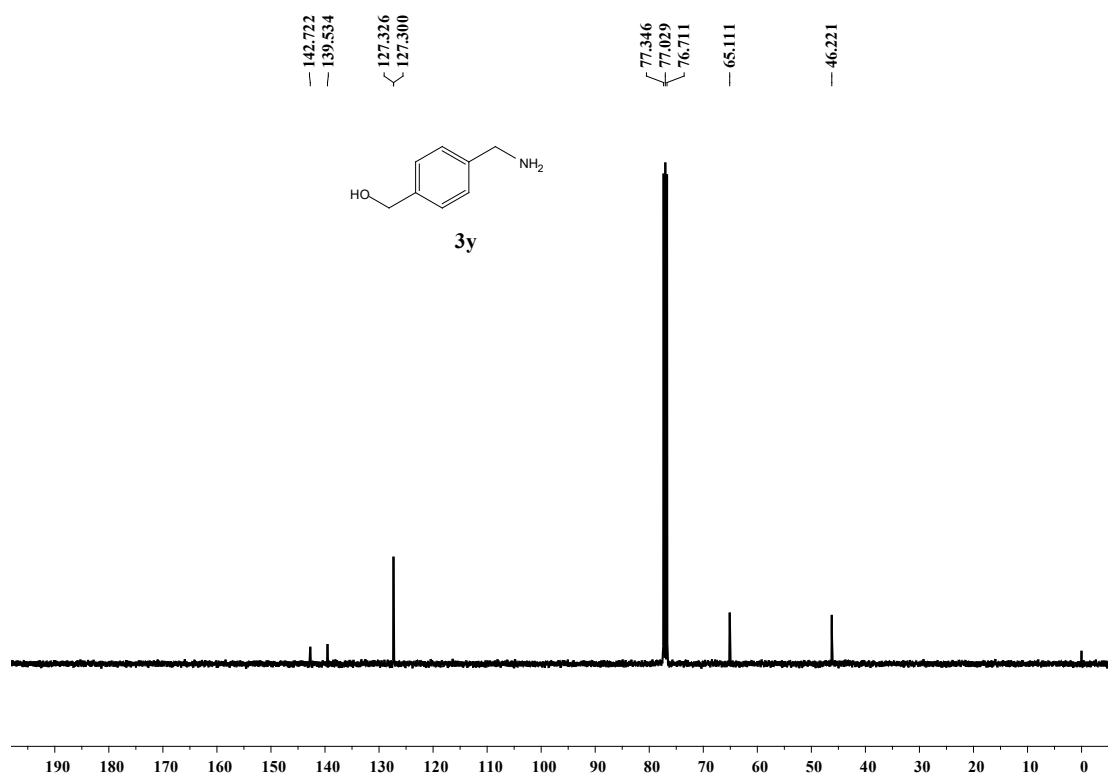

$^1\text{H}$  NMR, 400 MHz,  $\text{CDCl}_3$

7.410  
7.405  
7.393  
7.388  
6.654  
6.649  
6.637  
6.632  
— 4.205

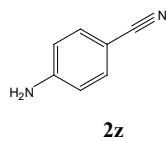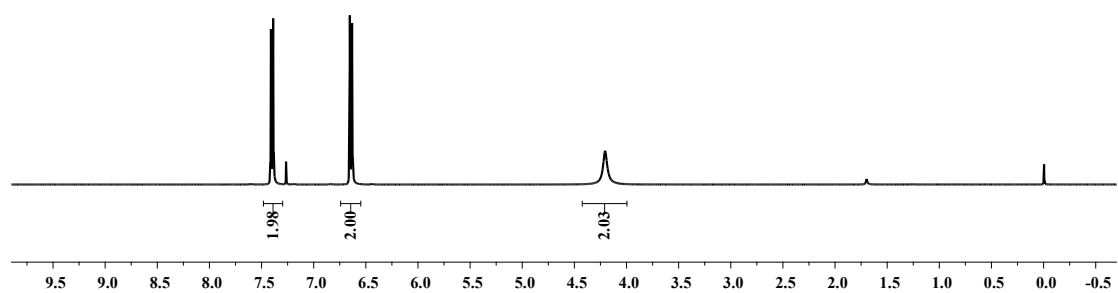

$^{13}\text{C}$  NMR, 100 MHz,  $\text{CDCl}_3$

150.512  
133.815  
120.230  
114.449  
100.044

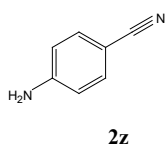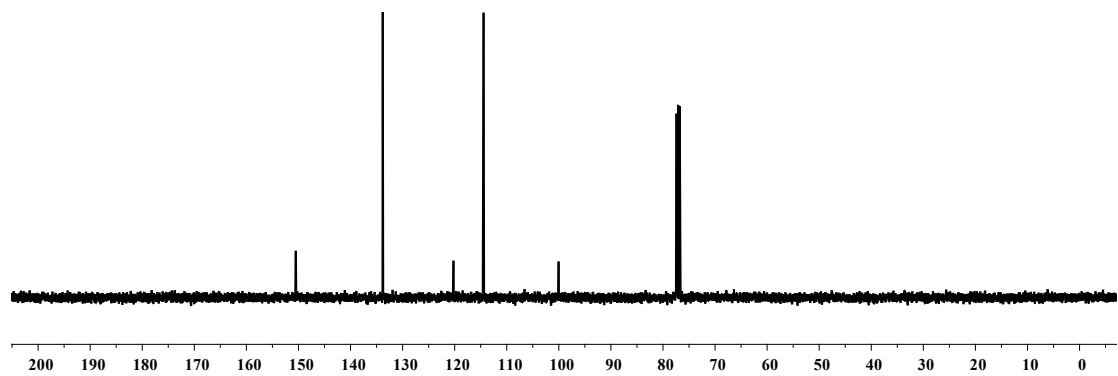

Supplement: d2nr01722a1.pdf [file d2nr01722a1.pdf]
